1 **Phylogenomics, Epigenomics, Virulome, and Mobilome of Gram-negative Bacteria Co-**  
2 **resistant to Carbapenems and Polymyxins: A One-Health Systematic Review and Meta-**  
3 **analyses**

4 Winnie Thabisa Ramaloko and John Osei Sekyere<sup>#</sup>

5 Department of Medical Microbiology, School of Medicine, Faculty of Health Sciences,  
6 University of Pretoria, South Africa.

7 <sup>#</sup>Address correspondence to Dr. John Osei Sekyere: [jod14139@gmail.com](mailto:jod14139@gmail.com)

8 **Running Head:** Genomics of carbapenem & colistin co-resistance

9 **Tweet:** “*Carbapenems & polymyxins are reserved antibiotics for fatal bacterial infections.*  
10 *Resistance to both agents is rising in pathogenic bacteria globally, threatening efficient*  
11 *antimicrobial chemotherapy.*”

12 **Author summary:**

13 Carbapenem and polymyxin co-resistance in Gram-negative bacteria (GNB) is a growing  
14 public health concern globally. China presented a high number of highly resistant bacteria  
15 from humans, animals, and environmental samples. *Escherichia coli* isolates were the most  
16 dominant in China, while *Klebsiella pneumoniae* isolates dominated Greece, the second  
17 country with high numbers of carbapenem and colistin co-resistant strains. Mobile genetic  
18 elements including plasmids are responsible for disseminating such resistance genes.  
19 Worryingly, GNB with Carbapenem and polymyxin co-resistance also harbours genes that  
20 make them resistant to other antibiotics, making them multi-drug resistant.

21

22

23 **Abstract**

24 Gram-negative bacteria (GNB) continue to develop resistance against important antibiotics  
25 including last-resort ones such as carbapenems and polymyxins. An analysis of GNB with co-  
26 resistance to carbapenems and polymyxins from a One Health perspective is presented.

27 Data of species name, country, source of isolation, resistance genes (ARGs), plasmid type,  
28 clones, and mobile genetic elements (MGEs) were deduced from 129 articles from January  
29 2016 to March 2021. Available genomes and plasmids were obtained from PATRIC and  
30 NCBI. Resistomes and methylomes were analysed using BAcWGSTdb and REBASE whilst  
31 Kaptive was used to predict capsule typing. Plasmids and other MEGs were identified using  
32 MGE Finder and ResFinder. Phylogenetic analyses were done using RAxML and annotated  
33 with MEGA 7.

34 A total of 877 isolates, 32 genomes and 44 plasmid sequences were analysed. Most of these  
35 isolates were reported in Asian countries and were isolated from clinical, animal, and  
36 environmental sources. Colistin resistance was mostly mediated by *mgrB* inactivation, while  
37 OXA-48/181 was the most reported carbapenemase. IncX and IncI were the most common  
38 plasmids hosting carbapenemases and *mcr* genes. The isolates were co-resistant to other  
39 antibiotics, with *floR* (chloramphenicol) and *fosA3* (fosfomycin) being common; *E. coli*  
40 ST156 and *K. pneumoniae* ST258 strains were common globally. Virulence genes and  
41 capsular KL-types were also detected. Type I, II, III and IV restriction modification systems  
42 were detected, comprising various MTases and restriction enzymes. The escalation of highly  
43 resistant isolates drains the economy due to untreatable bacterial infections, which leads to  
44 increasing global mortality rates and healthcare costs.

45 **Keywords:** Carbapenem; polymyxins; One Health; resistome; resistance plasmids;  
46 methylome; virulome.

## 47        **1. Introduction**

48        Antibiotics resistance (AR) in Gram-negative bacteria (GNB) result in severe infections that  
49        are difficult to treat. Multiple AR genes (ARGs) in GNB, which confer resistance to two or  
50        more antibiotics, make the host bacteria multi-drug resistant (MDR) <sup>1,2</sup>. GNB are  
51        continuously evolving as new genetic elements emerges and outspreads <sup>3-5</sup>, increasing the  
52        incidence and dissemination of MDR infections that pose a huge threat to public health  
53        globally<sup>6</sup>. High demands for and over prescription of antibiotics in humans and animals have  
54        resulted in an increasing burden of AR globally <sup>7,8</sup>. Increasing rates of AR in GNB have  
55        influenced and driven the need for novel antibiotics and newer treatment therapies <sup>9,10</sup>.  
56        Antibiotics such as cepheems and carbapenems have successfully been used to treat infections  
57        caused by highly resistant GNB, particularly *Enterobacteriaceae* <sup>1,11,12</sup>. However, enormous  
58        use of these antibiotics in human and veterinary medicine is resulting in the emergence of  
59        bacterial resistance to these important antibiotics <sup>13</sup>. An even more concerning problem is that  
60        carbapenem-resistant GNB also develop resistance to other antibiotics, including polymyxins  
61        such as polymyxin E (colistin), which is regarded as the last “hope” and has been effective in  
62        treating infections caused by MDR GNB thus far <sup>14-16</sup>.

63        Carbapenems are antibiotics that are reserved for treating infections caused by most  
64        infectious pathogens, including carbapenem-resistant *Enterobacteriaceae* (CRE<sup>3,13</sup>). They are  
65         $\beta$ -lactams with an extensive activity against infectious GNB, which cause complex, highly  
66        resistant infections <sup>1</sup>. Carbapenems are hydrolyzed by enzymes known as carbapenemases  
67        that target the  $\beta$ -lactam ring of a  $\beta$ -lactam antibiotic to deactivate it <sup>17,18</sup>. Carbapenemases  
68        include the broad-spectrum New Delhi metallo- $\beta$ -lactamase (NDM), Verona integron-  
69        encoded metallo- $\beta$ -lactamase (VIM), Imipenemase (IMP) <sup>19,20</sup>, Oxacillinases (OXA) <sup>21</sup>,  
70        Guiana extended-spectrum  $\beta$ -lactamases (GES) and *Klebsiella pneumoniae* carbapenemase  
71        (KPC) <sup>17,22</sup>.

72 While there is still an ongoing global battle against acquired carbapenem resistance in GNB,  
73 polymyxin resistance is also emerging at a faster pace<sup>23</sup>, owing to the global increase in the  
74 use of polymyxins to treat carbapenem-resistant infections<sup>14,15</sup>. Polymyxin resistance is  
75 primarily mediated by a mobile colistin resistance (*mcr*) gene<sup>14,15</sup>, as well as by  
76 modification(s) in or loss of lipopolysaccharides (LPS) and increase in capsule production,  
77 which often prevents polymyxins from binding to the target site<sup>23,24</sup>. Polymyxins are  
78 positively charged antimicrobial peptides and they target negatively charged LPS of the  
79 bacterial outer membranes<sup>25</sup>. Notably, the *mcr* gene is mostly located on plasmids, giving  
80 them an advantage to spread to other bacteria easily and rapidly. Presently, ten variants of the  
81 *mcr* gene have been identified, with the *mcr-1* gene being the most common and first  
82 identified variant<sup>14,15</sup>. Chromosomally, polymyxin resistance occurs via active mutations in  
83 the two-regulatory systems, which in turn modifies the LPS<sup>24</sup>. Several studies have now  
84 reported that mutations in the two-component systems; CrrA/B, PmrA/B and PhoP/Q and  
85 inactivation of the negative regulatory gene *mgrB* are connected to polymyxin resistance in  
86 GNB<sup>22,24,26–28</sup>. These systems play a role in the modification of the LPS, which confers  
87 colistin resistance in GNB<sup>15</sup>. The two-regulatory systems in GNB regulate cellular function  
88 based on various environmental signals including antibiotic exposure<sup>29</sup>.

89 The *pmrAB* system is part of the *pmrABC* operon, which play a huge role in chromosomal  
90 colistin resistance. This operon encodes cytoplasmic membrane-bound sensor kinase (PmrB),  
91 regulatory protein (PmrA) and a putative membrane protein (PmrC)<sup>15</sup>. LPS is negatively  
92 charged, which ideally increase binding affinity for positively charged colistin molecules.  
93 However, mutations on the two regulatory system modifies the LPS, reducing its overall  
94 negative charges. This in turn lowers the chances of colistin molecules to bind, making a  
95 bacterium resistant to colistin<sup>30</sup>. Mutation(s) on *pmrA* and/or *B* genes may lead to the  
96 modification of Lipid A, which may results in colistin resistance<sup>29</sup>. The *phoPQ* system

97 regulates the *pbgP* operon<sup>15</sup>, which encode membrane enzymes that are responsible for the  
98 formation and addition Ara4N (4-amino-4deoxy-L-arabinose) to Lipid A<sup>31</sup>. Such enzymes  
99 are EptA (phosphothanolamine) and ArnT (glycosyltransferase) and are responsible for the  
100 remodelling of the surface structure of the Lipid A by adding Ara4N to 4' position of the  
101 Lipid A<sup>24</sup>. Therefore, the expression of such gene's triggers Lipid A modification, thus  
102 mediate bacterial polymyxin resistance. Furthermore, any changes on the *mgrB* and *crrB*  
103 regulatory genes also results in the activation of ArnT and EptA through the *arnBCADEF*  
104 operon respectively<sup>24,25</sup>.

105 Co-resistance to polymyxins and carbapenems is critical and more concerning as it threatens  
106 global antibiotic chemotherapy, patients' recovery, and the economy<sup>15, 3</sup>. Unfortunately,  
107 such bacteria also harbour other ARGs conferring resistance to aminoglycosides (*rmtA-H*,  
108 *armA*, *aac6'-IIIb*), fosfomycin (*fosA*), cephalosporin (*bla<sub>CTX-M</sub>*), tetracycline (*tet*) and  
109 florfenicol (*floR*)<sup>16,32,33</sup>. Hence, GNB with co-resistance to polymyxins and carbapenems are  
110 mostly always MDR. This crisis continues to challenge healthcare facilities, increasing  
111 morbidities, mortalities, and healthcare costs<sup>34</sup>.

112 In addition to ARGs, bacteria have systems that allow them to survive antibiotic stress and  
113 other external aggression. Such systems include the production of protective capsules and  
114 restriction modification systems (RMS): DNA methylases (MTases) and restriction  
115 endonucleases (REs)<sup>35</sup>. DNA methylation is the principal epigenetic modification in cellular  
116 processes including DNA replication and repair, lowering of transformation, transcriptional  
117 modulation, regulation of gene expression and defense against foreign DNA<sup>35</sup>. DNA  
118 methylation is also important in regulating gene expression including that of resistance and  
119 virulence genes<sup>36</sup>. MTases and Res have the same DNA recognition site (motif) and are  
120 frequently encoded alongside each other<sup>35</sup>. Mtases methylates DNA by adding a methyl  
121 group and restriction endonucleases cleave exogenous DNA owing to different patterns of

122 methylation<sup>37</sup>. However, MTases can either act with or independent from restriction enzymes  
123 and such MTases are referred to as orphan MTases<sup>35</sup>.

124 Although these processes are also found in eukaryotes, they are very diverse in prokaryotes  
125 and are categorized as Type I, II, III and IV<sup>35,37,38</sup>. These classifications are differentiated by  
126 recognition site, cleavage site, subunit composition and the type of substrate<sup>38</sup>. Type I and II  
127 are the most prevalent systems in bacteria. The Type I system constitute three subunits, which  
128 are responsible for specificity (S), modification (M) and restriction (R)<sup>35,38</sup>. On the other  
129 hand, the Type II system has the R and M subunits only<sup>38</sup>. The R and M genes in type II  
130 system are separate but has the same binding site<sup>38</sup>. The type II restriction enzymes  
131 recognize and destroy acquired and/or foreign DNA with either incomplete or absence of  
132 methylation signature (motif)<sup>39</sup>.

133 Mtases may be associated with mobile genetic elements (MGEs) such as plasmids and  
134 transposons that contribute to the difference in bacterial methylation patterns<sup>35</sup>. Furthermore,  
135 the RMS may also be encoded by genes found on chromosome or plasmids, which are also  
136 responsible for disseminating ARGs<sup>40</sup>. Hence, plasmids without the same methylation  
137 signatures as the host cell are regarded as “foreign” and will be susceptible to cleavage by  
138 restriction endonucleases<sup>39</sup>.

139 Bacteria also produce and secrete extracellular material called polysaccharide capsules which  
140 allow them to bypass the host immune system<sup>41</sup>. These are usually made of a chain of simple  
141 sugars attached to the outer surface of bacterial cells and are therefore the first elements to  
142 interact with the host<sup>41</sup>. The formation of these capsules is linked to efflux pumps, which are  
143 pervasive membrane transporter proteins and are important for bacterial antibiotic resistance  
144<sup>42-44</sup>. These systems pump out toxic substances/solutes such as metabolites and antimicrobial  
145 agents from the cell<sup>42</sup>. Efflux pump such as knpEF, a regulatory member of small multidrug

146 resistance protein (SMR) group mediates polymyxin resistance<sup>42,43</sup>. This pump is responsible  
147 for the formation of capsular polysaccharides in *K. pneumoniae*<sup>42-44</sup>. When this pump is  
148 activated, more capsules are synthesized leading to an increase in colistin resistance as they  
149 serve as a barrier between colistin and bacterial cells<sup>42</sup>. Therefore, resistance level in GNB  
150 may depend on the number of capsular polysaccharides produced<sup>42</sup>. Furthermore, tighter  
151 encapsulation in *K. pneumoniae* also contribute to the increase in polymyxin resistance. This  
152 occur through the inactivation of the *mgrB* gene, resulting in harder and tightly bound  
153 capsular polysaccharides<sup>45</sup>.

154 Antibiotic resistance is commonly disseminated through MGEs including transposons,  
155 plasmids, and insertion sequences<sup>40</sup>. Plasmids are the most common vehicle for resistance  
156 genes transmission, offering an advantage to bacteria as it may bypass the species barrier  
157<sup>3,4,15</sup>. Therefore, plasmid borne ARGs such as *mcr* and carbapenemases are widespread due to  
158 their faster dissemination rate among bacteria species<sup>40</sup>. Owing to the close connection  
159 between humans, animals, and the environment (water, soil, air, and communities/built  
160 environment), ARGs and virulence mechanisms can be disseminated between these three  
161 domains through bacterial hosts and plasmids<sup>7,8,46</sup>. Thus, antibiotics administration in  
162 livestock/food-producing animals may select and spread antibiotic-resistant GNB to humans  
163 and the environment through the food chain<sup>7,8,46</sup> and their faeces/farm effluents,  
164 respectively. Therefore, applying the One Health concept, which describes the interaction  
165 between humans, animals, and the environment, may be effective in reducing the spread of  
166 ARGs between these domains<sup>47</sup>. Herein, we present an epidemiological and molecular  
167 analysis of GNB that are co-resistant to carbapenems and polymyxins from a One Health  
168 perspective.

169 ***Evidence before this review***

170 Dandachi et al. (2018) published a review based on a study done in the Mediterranean basin,  
171 which only focused on co-resistance of carbapenem and colistin among GNB from animal  
172 samples<sup>48</sup>. Thus, the study was only based on a specific region and samples were isolated  
173 from one source (animals) only. Furthermore, the study did not address the epigenomics,  
174 genomics, virulome, and evolutionary phylogenomics of the resistant isolates. So far, not  
175 much is known about the depth of the genetic structure of GNB with carbapenem and colistin  
176 co-resistance; such evidence is still missing. Another review article on a multidrug-resistant  
177 GNB done in the Middle-East was published<sup>49</sup>. Although this study reported from a One  
178 Health view from a region, it did not look at the epigenomics and evolutionary phylogenetics  
179 of the isolates.

180 ***Purpose of this systematic review***

181 This systematic review and genomic analyses report on a One Health epidemiology of  
182 colistin resistance in carbapenemase-producing GNB on a global scale. Further, the  
183 epigenomics, mobilome, capsules and virulome of GNB genomes with carbapenem and  
184 colistin resistance mechanisms are described alongside their geographic location, sample  
185 source, and other ARGs.

186 **2. Methods**

187 ***2.1 Literature search***

188 An extensive literature search was done on PubMed using the following search  
189 words/phrases: carbapenem\* AND colistin/polymyxin AND resistan\* AND Gram-negative  
190 bacteria; carbapenem\* AND colistin/polymyxin AND resistan\* AND bacteria; and  
191 carbapenem\* AND mcr AND resistan\* AND bacteria. The search was done in a factorial



192 fashion. Other search engines used included google scholar, ScienceDirect and ResearchGate,  
193 which resulted in twelve additional papers.

#### 194 ***2.1.1 Inclusion and exclusion criteria***

195 Articles published between January 2016 and March 2021 were included. A total of 1769  
196 articles that did not address GNB and were excluded (Table S1\_A). Further screening  
197 excluded 66 articles, which focused on the resistance to one antibiotic. A total of 129 articles,  
198 which focused on carbapenem and polymyxin co-resistance in GNB, were included for  
199 qualitative synthesis and statistical analyses (Table S1\_B).

#### 200 ***2.2 Collection and characterization of isolates in included studies.***

201 For studies included in this review, samples were broadly collected from hospitals, farms, and  
202 animal slaughterhouses. GNB were isolated from bodily fluids, wounds, catheter tip, floor,  
203 sewage as well as from food. After sample collection, bacteria were cultured, followed by  
204 DNA extraction, gene amplification and whole-genome sequencing. For antibiotic  
205 susceptibility tests (AST), most studies employed the broth microdilution method (BMD) to  
206 determine colistin resistance<sup>19,22,50-52</sup>. The genomic sequences were also used to identify  
207 carbapenemases and colistin resistance mechanisms, as well as assign sequence types (ST) of  
208 clones based on multi-locus sequence typing (MLST)<sup>53</sup>. Conjugation assays were used to  
209 assess the transferability of carbapenem and colistin ARGs followed by the selection of  
210 transconjugants on various agar plates containing various antibiotics including carbapenem  
211 and colistin.

212 For this study, bioinformatics and statistical analyses of downloaded genomes and extracted  
213 data were undertaken, respectively. Information such as the geographical distribution, sample  
214 source, species, clones, ARGs, MGEs and plasmids replicons/incompatibility (Inc) groups

215 was extracted. A total of 877 GNB isolates from different sources were analyzed (Table  
216 S2\_A).

### 217 **2.3 Statistical analysis**

218 Data from 129 articles was analyzed using Microsoft Excel 365. Differences and patterns  
219 across different data variables such as countries, species, specimen sources, ARGs, MGEs  
220 etc. were also analyzed using Microsoft Excel 365. Furthermore, results were visualized  
221 through bar charts, pie charts and maps from Microsoft Excel. Statistical significance  
222 between different data sets and variance analysis were calculated using One-way ANOVA  
223 and/or One Sample T-test on GraphPad. A probability value (p-value) of <0.05 was defined  
224 as a significant correlation between different datasets.

### 225 **2.4 Included Genomes.**

226 Whole genome (chromosome and plasmid) sequences of isolates with both carbapenem and  
227 colistin resistance were downloaded from the NCBI (<https://www.ncbi.nlm.nih.gov/>) and  
228 PATRIC (<https://patricbrc.org/>) bacterial genome databases, using the accession numbers  
229 provided in the included articles. A total of 32 whole genome sequences and 44 plasmids  
230 were retrieved. Of the 44 plasmids, 28 and 16 were respectively associated with  
231 carbapenemases and *mcr* genes, respectively. Other isolates were not included in the analysis  
232 because their accession numbers were either not provided or not found on the databases.

### 233 **2.5 In silico analyses of included genomes.**

234 For the available genomes, the DNA methylases (methylome), motifs, RMS were identified  
235 on the restriction enzyme databases (REBASE) (<http://rebase.neb.com/rebase/rebase.html>)  
236 hosted at the Centre for Genomic Epidemiology. ARGs and plasmids replicon were  
237 determined using ResFinder (<https://cge.cbs.dtu.dk/services/ResFinder/>) and plasmidFinder  
238 (<https://cge.cbs.dtu.dk/services/PlasmidFinder/>) whilst the virulomes were identified using

239 [BACWGSTdb \(http://bacdb.org/BacWGSTdb/\)](http://bacdb.org/BacWGSTdb/). Other MGEs were identified using using  
240 MGE Finder (<https://cge.cbs.dtu.dk/services/MobileElementFinder/>). The evolutionary  
241 phylogenetics of the isolates were analysed on RaxML (<https://raxml-ng.vital-it.ch/#/>).  
242 Phylogenetic trees were visualized and annotated using Molecular Evolutionary Genetics  
243 Analysis version (MEGA) 7.0<sup>54</sup>. Predictions of capsules polysaccharides were done on the  
244 Kaptive WEB (<https://kaptive-web.erc.monash.edu/>) based on the K-type serotyping of *K.*  
245 *pneumoniae*<sup>55</sup>.

### 246 3. Results

#### 247 3.1 Global distribution of colistin and carbapenem co-resistant GNB isolates

248 Literature search resulted in a total of 3048 articles published in English with two duplicates,  
249 resulting in 3046 articles for screening. Further review and sorting resulted in 195 articles of  
250 which 66 were excluded and the remaining 129 articles were used or meta-analyses. (Figure  
251 1). A total of 877 isolates from 43 countries were included for analyses. These constituted  
252 various species including *Klebsiella* spp. (n = 536), *Escherichia coli* (n = 210), *Acinetobacter*  
253 spp. (n = 71), *Enterobacter* species (n = 20), *Pseudomonas aeruginosa* (n = 18), *A.*  
254 *calcoaceticus-A.baumannii* complex (n = 13), *Cronobacter sakazakii* (n = 2) and *Citrobacter*  
255 *amalonaticus* (n = 1) (Figure 2A).

256 Carbapenem and polymyxin co-resistance in GNB was detected in five continents across the  
257 globe, except for Australia (Figure 2B). Asia presented high numbers of carbapenem and  
258 polymyxin co-resistance (n = 415), followed by Europe (n = 333), South America (n = 76),  
259 Africa (n = 35), and North America (n = 9) (Figure 2B). As shown in Figure 2B, cases of  
260 emerging MDR GNB with co-resistance to carbapenem and colistin have mostly been  
261 reported in Asian countries. China, having the highest cases globally and in Asia, reported  
262 19.54% MDR GNB isolates (n = 171/877) of MDR GNB with carbapenem and polymyxin

263 co-resistance. Although co-resistance to last-resort antibiotics in GNB is more prevalent in  
264 China, it is evident that this trend has spread beyond Asian countries into European countries  
265 such as Greece and Portugal representing 13.7% (n = 120) and 3.0% (n = 26), respectively.

266 Asia, Europe, and North America reported carbapenem-polymyxin resistance in GNB from  
267 animals while Africa and South America only presented GNB isolates from humans. Overall,  
268 human samples globally constitute 65.5% (n = 574) while animals, environment and  
269 unknown sources represents 8.7% (n = 76), 5.7% (n = 50) and 20.2% (n = 177), respectively  
270 (Figure 2C). The statistical analysis of all sample sources was significantly reported in  
271 different countries (p = 0.02) (Table S2\_B).

272 China presented the most diverse specimen sources than other countries, with four species.  
273 China reported resistant isolates from all samples sources but showed a non-significant  
274 association among sample source (p = 0.75) Table S2\_C). Figure 2C shows that of the cases  
275 reported in China, 37.4% (n = 64) of the isolates were from human samples, 35.08% (n = 60)  
276 from animals, two from unknown sources (1.2%), and 26.3% (n = 45) from environmental  
277 sources including slaughterhouses, farm, water, sewage etc. Furthermore, Liu B et al (2017)  
278 and Wang R et al (2018) reported a total of 14 and 26 isolates from animals' source,  
279 respectively<sup>6,56</sup>. Of the isolates reported by Wang R et al (2018), three isolates (*E. coli*  
280 WFA16004, *E. coli* WFA16019 and *E. coli* WFA16061) presented a new sequence type. A  
281 total of 18.0% (n = 21) of the cases in Greece were from human samples, and the remaining  
282 83.0% (n = 99) were of unknown sources. Iran (7.52%, n = 66) and Korea (5.01%, n = 44)  
283 also presented more cases of carbapenem and colistin co-resistance in Asia<sup>6</sup>. In contrast to the  
284 cases reported in China, Iran and Korea do not have any animal or environmental cases of  
285 GNB harbouring carbapenem and polymyxin ARGs (Figure 2C).

## 286 **3.2 Resistomes of GNB with carbapenem & polymyxin co-resistance**

### 287 **3.2.1 Carbapenem & polymyxin resistance mechanisms**

288 From a total of 877 reported GNB isolates, there was a significant association between  
289 ARGs/resistance mechanisms in different countries ( $p = 0$ ) Table S2\_D). Colistin resistance  
290 through the inactivation of the *mgrB* gene presented 37.3% ( $n = 322$ ), while resistance  
291 through *mcr-1* gene presented 36.2% ( $n = 312$ ) (Figure 3A). Resistance via mutation of the  
292 regulatory systems was 5.10% ( $n = 44$ ) and 3.82% ( $n = 33$ ) for *prmA/B/C* and *phoP/Q*,  
293 respectively. Furthermore, six isolates were resistant to colistin via mutation on the *crbB*  
294 gene: one in Colombia (*K. pneumoniae* C7), France (*K. pneumoniae* 20.70), Greece (*K.*  
295 *pneumoniae* G104), and South Africa (*K. pneumoniae* Af44b) and two from Brazil (*K.*  
296 *pneumoniae* CrB8i & CrB9i) (Table S2\_A). A total of 146 isolates (17.0%) were resistant to  
297 colistin, but their resistance mechanisms were not specified. Of the undetected mechanism,  
298 one strain, *A. colistiniresistens* from a human sputum in Japan, was reported to be naturally  
299 resistant to colistin<sup>57</sup>. *mcr-1*-mediated colistin resistance was more prevalent in *E. coli*  
300 isolates ( $p = 0.72$ ) while resistance via mutations in the regulatory systems was only reported  
301 in *K. pneumoniae* ( $p = 1.00$ ) and *A. baumannii* ( $p = 1.00$ ) Table S2\_E). *mcr-1* was frequently  
302 associated with IncX<sub>4</sub> replicon plasmids in *E. coli* species<sup>58,59</sup>. Another variant in the *mcr*  
303 family, *mcr-9*, was detected in *K. pneumoniae* isolates and was more prevalent in European  
304 countries including Montenegro ( $n = 10$ ) and Spain ( $n=7$ )<sup>20</sup>. This gene was also reported in  
305 Japan ( $n = 3$ )<sup>57</sup> (Table S2\_A). Other identified *mcr* variants included *mcr-1.2* reported in  
306 Italy<sup>33</sup>, *mcr-1.5*<sup>60</sup> from Argentina and *mcr-3*<sup>60</sup>, 3.5, and 4.3<sup>61</sup>, and *mcr-8*<sup>62</sup> from China.  
307 These were each detected from human samples; except *mcr-8* which was isolated from a  
308 swine in China (Table S2\_A).

309 Carbapenemases such as NDM, OXA-48 type, IMP, VIM, GES, SCO, BKC and KPC were  
310 reported, where OXA-48 type, NDM and KPC were the most common carbapenemases

311 (Figure 3B). The most common carbapenemases reported globally was OXA-48 type  
312 presenting 45.0% (n = 411) of 877 isolates and this was prevalent in *K. pneumoniae* isolates  
313 (n = 249). This was followed by NDM 29.0% (n =261), KPC 21.0% (n = 192), and VIM  
314 4.0% (n = 37), IMP 1.0% (n = 10). IMI (n = 3), GES-5 (n = 1), SCO-1 (n = 1) and BKC-2 (n  
315 = 1) were less the 1% of carbapenemases (Figure 3B). The most common variant of NDM  
316 was *bla*<sub>NDM-5</sub>, which was more prevalent in *E. coli* isolates from China. OXA-48 was mostly  
317 reported in *K. pneumoniae* and *P. aeruginosa* isolates, while OXA-23 was found in *A.*  
318 *baumannii* (in Seoul, South Korea) and in *A. calcoaceticus*-*A. baumannii* complex (in India)  
319 from human samples (Table S2\_A). Notably, *mcr-1* mostly co-occured with the *ndm-5*  
320 and/or *ndm-9*, mostly in *E. coli* isolates. Furthermore, colistin resistance by mutation co-  
321 existed with *kpc* in *K. pneumoniae* isolates.

### 322 **3.2.2 ARGs associated with polymyxins and carbapenem co-resistance in GNB**

323 The resistance profiles of the isolates in Figure 4A & B indicated resistance to a broad  
324 spectrum of antibiotics including penicillins, cephalosporins, aminoglycosides,  
325 fluoroquinolones, tetracyclines, sulphonamides, and rifampins<sup>16,22,32,63</sup> The expression of  
326 these genes would be problematic as it increases MDR and extensively drug-resistant (XDR)  
327 GNB, thus threatening global health.

328 Resistance profiles of 185 isolates are presented in Figure 4A & B. Other isolates were not  
329 included because of the unavailability of genome accession numbers and lack of such  
330 information from articles. The overall analysis of the resistance profiles showed that *sul1-3*,  
331 *floR* and *fosA3* genes, which codes for sulfamethoxazole, chloramphenicol and fosfomycin  
332 resistance respectively, were commonly associated with carbapenem and polymyxins  
333 resistance determinants. This was particularly true for most *E. coli* isolates globally, whilst  
334 extended-spectrum  $\beta$ -lactamases (ESBLs), viz. *bla*<sub>SHV</sub> and *bla*<sub>CTX-M</sub>, were more common in  
335 *K. pneumoniae* globally, except for *K. pneumoniae* isolates in Portugal. The abundance of

336 other antibiotics' ARGs associated with those of carbapenem and colistin were higher in  
337 China, Pakistan, and Vietnam, suggesting that MDR genotypes are rapidly increasing and  
338 spreading in Asian countries than on other continents.

339 As shown in Figure 4A & B, *bla*<sub>CTX-M</sub> was found in *E. coli* isolates from animals in China,  
340 but it was absent in *E. coli* IHIT31346 from animal sample in Italy. This gene was also  
341 detected in *E. coli* isolates from human samples from China (n = 6) and single isolates from  
342 France, Venezuela, Korea, Russia, and Japan. It was also found in *K. pneumoniae* from 10  
343 different countries, and in *E. coli* 3w-4 from an environmental sample from Germany (Figure  
344 4 A & B). Other common ARGs found in the 19 *E. coli* isolates from animals include *floR*  
345 and *fosA3*. Furthermore, three of the 19 *E. coli* isolates from animals also harboured the  
346 *erm(B)* gene, which confers resistance to macrolides. Notably, isolates from animals,  
347 particularly in China, do not harbour many ARGs alongside carbapenemases and polymyxin  
348 ARGs. Except MDR *K. pneumoniae* KP91, only one isolate from animal origin in China,  
349 carried more diverse ARGs including *bla*<sub>SHV</sub>, *tet*, *strA/B*, *qxA/B*, *rmsE*, *mph(A)/(B)*, *sul1-3*,  
350 and *aph(4')-Ia*.

351 On the contrary, *E. coli* isolates from humans in China showed more diverse distribution of  
352 ARGs (Figure 4A & B). However, this was not the case for *E. coli* BJ13 and NCCHD1261-5,  
353 which only harboured two  $\beta$ -lactamases; same was observed for *K. pneumoniae* TK401. As  
354 observed in China, human isolates from other countries also showed diverse ARG  
355 distribution than isolates from animals and the environment. Nonetheless, one environmental  
356 isolate from Germany, *E. coli* 3w-4, harboured more ARGs including *tet (B)*, *aac(6')-lb-cr*,  
357 *catB2*, & *catB*, *drfA17*, and *bla*<sub>CTX-M</sub> (Figure 4B). As shown for *E. coli* isolates in China, the  
358 *K. pneumoniae* isolates from human samples in Pakistan and Vietnam were resistant to a  
359 broad spectrum of antibiotics including quinolones (*aac(6')-lb-cr*, *oqxA/B*, *qnrB/S* ),  
360 tetracycline (*tet*), and aminoglycoside (*aac(3)-IIa*, *aac(6')-lb-cr*, *aadA*, *aph(3')-lb*, *aph(6)-ld*)



361 (Figure 4A & B). An uncommon resistance gene, *cmIA5*, which is responsible for  
362 chloramphenicol resistance, was detected in *K. pneumoniae* isolates (n = 3) from human  
363 samples (Vietnam) and in *E. coli* IHIT31346 of animal origin (Italy)<sup>64</sup>. Furthermore, this  
364 gene was also reported in abundance in China (n = 12) from *E. coli* isolates from animal,  
365 human, and environmental samples, implying the presence of chloramphenicol resistance in  
366 Asian and European countries. In China, human isolates generally had a rich resistome  
367 repertoire than isolates from animals and the environment.

368 Libya reported a total of 12 isolates from human samples, all of which harboured the  
369 following genes: *tet*, *aadA*, *aac(6')-lb-cr*, *aph(3=)lla*, *aph(3=)-lb*, and *qnrB/S* (Figure 4A).  
370 An isolate reported in Libya, *A. baumannii* 28 (ST164) was highly resistant, carrying  
371 additional ARGs including those against phenicol (*floR*, *catA/B*) and sulphonamides (*sulI-3*).  
372 Furthermore, human isolates in Libya and Portugal lacked ESBL genes except *K.*  
373 *pneumoniae* ST45 in Portugal from which the *bla<sub>SHV</sub>* gene was found. Unlike isolates in  
374 Libya, isolates from Portugal did not harbour *sulI-3* genes. However, the *sulI-3* genes and  
375 additional ARGs such as *strA/B* and *mph(A)/(E)* were detected in *E. coli* Ec36 from a human  
376 sample in Portugal (Figure 4B). Further analysis of the resistance profiles revealed that  
377 multidrug resistance genotypes are generally not common in the US as the reported isolates  
378 only harboured ESBLs genes. This might be due to the number of carbapenem and colistin  
379 co-resistant isolates reported in the country, which calls for further studies.

### 380 **3.3 Mobilome**

#### 381 **3.3.1 Plasmid profiles of GNB with carbapenem and colistin resistance**

382 (Table S3\_D) shows a total of 18 plasmid incompatibility groups. Plasmid replicons  
383 associated with carbapenem and colistin resistance genes reported globally includes IncI2/3,  
384 IncX3/4, IncH12, IncF/IIK/II/IB, IncN, IncA/C, IncL/M, IncP, IncR, IncY, IncA/C2, IncR,  
385 IncY and IncB/O (P= 0.002) (Table S3\_B). Additionally, some countries reported hybrid



386 plasmids, which harbors ARGs for different antibiotics. So far, China is the only country  
387 reporting the co-existence of carbapenem and colistin ARGs on a hybrid plasmid <sup>65</sup>. The  
388 *bla*<sub>NDM-5</sub> and *mcr-1* genes were both carried by a single replicon hybrid plasmid, IncX<sub>3</sub>-X<sub>4</sub>  
389 identified in *E. coli* CQ02-121 which was isolated from a patient's rectal swab from a health  
390 facility in China <sup>65</sup>.

391 The IncX plasmids are widely reported as the most common MGE of carbapenems and  
392 polymyxins <sup>66</sup> (Figure 5A). Various groups of IncX plasmids, including IncX<sub>1</sub>-IncX<sub>8</sub> have  
393 been identified as carriers for transmissible carbapenem and polymyxin ARGs <sup>12,67</sup>. The most  
394 prevalent IncX plasmids associated with *bla*<sub>NDM</sub> (p = 0.107) and *mcr-1* (p = 0.999) ARGs  
395 (Table S3\_B). IncX<sub>3</sub> and IncX<sub>4</sub>, responsible for the transmission of *bla*<sub>NDM</sub> and *mcr-1* genes  
396 respectively <sup>16,64,65</sup>. The most common replicons for all isolates were IncX plasmids (n = 107)  
397 comprising IncX<sub>4</sub> (n = 57), IncX<sub>3</sub> (n = 49) and IncX<sub>1</sub>-N (n = 1). This was followed by IncI (n  
398 = 58), IncF (n = 50), IncH (n = 45), and IncB/O (n = 14) (Table S3\_D). The least reported  
399 replicons were IncP, IncL, IncR, and IncF<sub>1</sub>, IncI<sub>1</sub> and IncN, which were each reported in one  
400 or two isolates. The most common replicons, IncX<sub>3</sub> and IncF, were associated with  
401 carbapenemases, while IncX<sub>4</sub>, IncI and IncH were mostly associated with *mcr-1*.

402 As expected, China reported a diverse plasmid replicon due to the high number of reported  
403 isolates with carbapenem and polymyxin co-resistance (n = 171). Therefore, IncX plasmid  
404 groups were commonly found as the carrier of resistance genes in China (Figure 5A): China  
405 reported a total of 84 IncX plasmids which were mostly reported in *E. coli* isolates (n = 72) (p  
406 = 0.138) (Table S3\_B). Although *K. pneumoniae* in China did not harbour IncX plasmids, 25  
407 *K. pneumoniae* human isolates in Portugal had their *mcr-1* gene carried by IncX<sub>4</sub> plasmids  
408 (Figure 5B). The second most common plasmid was IncI, especially IncI<sub>2</sub>, which carried *mcr-*  
409 *I* and was commonly reported in China (n = 39).

410 IncL/M was only reported in Pakistan (n = 5) and it carried *bla<sub>OXA</sub>* genes in *K. pneumoniae*  
411 isolates (p = 0.057), while IncB/O replicon was only reported in *E. coli* (p = 0.138) isolates  
412 from animal samples in China (Table S3\_B). IncF carried *bla<sub>NDM</sub>* in various countries, whilst  
413 IncR was associated with various carbapenemases such as *bla<sub>NDM-1</sub>* in *E. coli* isolates from  
414 Vietnam (n = 1) and China (n = 1). It was also found with *bla<sub>KPC-2</sub>* in *E. coli* H17 from USA  
415 and *bla<sub>OXA-181</sub>* in *E. coli* IHIT31346 from animal sample in Italy. Another least common  
416 plasmid replicon associated with *bla<sub>NDM</sub>* in *E. coli* isolates was IncP, reported only in China  
417 and Japan (Figure 5B).

### 418 3.3.2 Other MGEs associated with carbapenem and colistin resistance.

419 In addition to plasmids, other MGEs associated with carbapenem and polymyxin resistance in  
420 GNB were reported. Such MGEs were 135 insertion sequences (IS), 60 transposons (Tnp)  
421 and four class I integrons (Table S3\_A). The most prevalent IS was IS903 (n = 28) and the  
422 most prevalent Tnp was *tnp4401d* (n = 31). Both IS903 (n = 108) and *tnp4401d* (n = 74) were  
423 more common in *K. pneumoniae* isolates (Table S3\_A). The IS903 was found within the *mgrB*  
424 gene in two *K. pneumoniae* isolates from the United states<sup>27</sup>. *mcr-9* was flanked by IS903,  
425 IS1 or cupin fold metalloprotein (WbuC) in ten *K. pneumoniae* isolates in Montenegro; as  
426 well as in Serbia (n = 1) and Belgium (n = 1). Likewise, these MGEs were further associated  
427 with *mcr-9* in *K. pneumoniae* isolates in Spain (n = 7), Slovenia (n = 1), and Denmark (n = 1)  
428 (Table S2\_A). *Tn4401d* was reported in *K. pneumoniae* isolates in Portugal (n = 21), USA (n  
429 = 2) and China (n = 1). This MGE was associated with *bla<sub>KPC-3</sub>* in Portugal, *mcr-8*, and  
430 *bla<sub>NDM</sub>* in China; and *bla<sub>KPC-2</sub>* in the United States (Table S2\_A). Three class I integrons were  
431 reported in two *K. pneumoniae* isolates with *bla<sub>KPC-2</sub>*, in Brazil and in *A. colinistiniensis*  
432 from Japan, which is naturally resistant to colistin<sup>57</sup> and harboured *bla<sub>IMP-34</sub>* and *bla<sub>OXA-58</sub>*.  
433 In416 integron was identified from *E. hormaechei* ME-1 isolate carrying VIM-4 in USA  
434 (Table S2\_A).

435 *ISAb125*, was associated with *bla<sub>NDM-5</sub>* in seven *E. coli* isolates from animal samples in  
436 China. This IS was also found in *Enterobacter cloacae* PIMB10EC27 from a human sample  
437 in Vietnam, flanking *bla<sub>NDM-1</sub>*; *E. cloacae* PIMB10EC27 further harboured *ISIR21*, *ISKpn19*  
438 and *Tn6901*<sup>68</sup>. *IS5* was reported in three *Enterobacter* strains from Japan where it was  
439 associated with *bla<sub>IMP-1</sub>*, as well as in two *K. pneumoniae* isolates where it was associated  
440 with *bla<sub>KPC-2</sub>* and *bla<sub>NDM/OXA</sub>*, from Brazil and Pakistan, respectively. Other reported IS  
441 includes *ISApI1* in *A. baumannii* TK1403, which existed alongside *bla<sub>OXA</sub>* genes, ISR in *K.*  
442 *pneumoniae* KP7 occurring with *bla<sub>KPC</sub>* (Table S2\_A).

443 *ISAb125* is the main carrier of *bla<sub>NDM</sub>*<sup>69</sup>, evinced by its appearance in two *E. coli* isolates  
444 facilitating the dissemination of *bla<sub>NDM-5</sub>* and *bla<sub>NDM-6</sub>* genes<sup>70</sup>. Ho et al (2018) also reported  
445 on *IS26-IAba125* transposon complex that is associated with *bla<sub>NDM-5</sub>* in isolates from animal  
446 origin<sup>71</sup>. *E. coli* Ec36 isolated from human urine in Portugal harboured *ISKpn7*, *ISKpn6* and  
447 *TN40*<sup>72</sup>. The most prevalent MGE on plasmids harbouring *mcr-1* was the insertion sequence  
448 *ISApI1* reported in China, Vietnam, Brazil, and Argentina (Table S2\_A). The *ISApI1*  
449 insertion is normally responsible for mobilising *mcr-1* in GNB<sup>40</sup>. In China, this MGE was  
450 associated with *mcr-1* from *E. coli* HeN001 and *C. sakazaki* WF5-19C (Table S2\_A). It was  
451 also associated with the acquisition and dissemination of ARGs from animal samples and was  
452 identified in *K. pneumoniae* isolates in Brazil and Vietnam from human samples. Further, it  
453 was associated with the IncI<sub>2</sub> replicon, which carried both *mcr-1.5* and *bla<sub>NDM-1</sub>* in *C.*  
454 *amalonaticus* isolates from human samples in Argentina.

### 455 **3.4 Capsular polysaccharides and virulome of GNB isolates**

456 Table S4 shows various plasmid-mediated and chromosomal-borne virulence genes in MDR  
457 GNB. Virulence genes were identified in 15 *K. pneumoniae*, 12 *E. coli* and one *E.*  
458 *hormaechei* isolates resulting in a total of 29 genes (Table S4). The most common virulence  
459 gene in *E. coli* isolates was *gad*, a chromosomal glutamate decarboxylase found on the outer

460 membrane. *E. coli* EC17GD31, isolated from human blood in Vietnam harboured 18  
461 chromosomal virulence genes, except for outer membrane protein complement resistance  
462 (*TraT*) (Table S4). These isolates also had two copies of the *gad* gene. *E. coli* MCR-1\_NJ,  
463 isolated in the United States, also harboured 18 virulence genes with duplicates of *Trat*, *terC*  
464 (tellurium ion resistance protein) and *KpsE* (capsule polysaccharide export inner-membrane  
465 protein) (Table S4). *E. coli* WI1 had a unique virulome structure, possessing unique virulence  
466 genes such as colicin B (*cba*), colicin ia (*cia*) and colicin M (*cma*), which were only shared  
467 with *E. coli* WI2 (Table S4).

468 For *K. pneumoniae* isolates, ferric aerobactin receptor (*iutA*) was commonly recorded *K.*  
469 *pneumoniae* KP-6884 and QS17-0029 harboured high numbers of virulence genes (n = 6).  
470 The least number of virulence genes were observed in *K. pneumoniae* CFSAN04457, 65, 73  
471 (n = 3) and *E. hormaechei* ME-1 (n = 1). All virulence factors in *K. pneumoniae* QS17-0029  
472 were found on the plasmid while KP-6884 had two *iutA* on the chromosome (Table S4). *K.*  
473 *pneumoniae* KP-6884 also presented a case where the same gene appeared both on a  
474 chromosome and plasmid (Table S4). Likewise, *traT* in *K. pneumoniae* isolates was also  
475 found on the plasmid. However, this gene was missing in *K. pneumoniae* CFSAN044572,  
476 CFSAN044573 and CFSAN044563 isolates.

477 Capsular polysaccharides were determined for 12 *K. pneumoniae* and one *A. colistiniresistens*  
478 isolates (Figure S1). The *Klebsiella* K-locus primary reference and the *Acinetobacter* K-locus  
479 primary reference were used to predict capsules for *K. pneumoniae* and *A. colistiniresistens*  
480 isolates, respectively. Eight KL-types and zero O-types were identified for *K. pneumoniae*  
481 isolates. The KL serotypes KL103, KL51, KL17 and KL2 were each identified in two isolates  
482 while KL112, KL107, KL102 and KL24 were present in one isolate, each (Figure S1). The  
483 capsular loci had between 15 and 23 genes, with two allelic types: *wzc* and *wzi*. The allelic  
484 types were present in all isolates and the genes were 99 to 100% identical to those of the

485 reference K-locus. *K. pneumoniae* HS11286 and CFSAN044563 belonged to KL103, and  
486 they had a high number of capsule genes (n = 21). Furthermore, *K. pneumoniae* QS17-0029  
487 and PIMBND2KP27 of KL50 presented the same capsular predictions (Figure S1). *A.*  
488 *colistiniresistens* NIPH1859 capsular predictions revealed that this isolate had KL132 with 21  
489 capsule genes. However, this isolate was missing the allelic types and none of the genes were  
490 100% to the primary KL reference (Figure S1).

### 491 **3.5 Epigenomics analyses in MDR GNB**

492 Herein, the methylome of 29 genomes are described (Table S5), of which 14, 9, three, and  
493 one isolate/s belonged to the genera *Klebsiella*, *Escherichia*, *Enterobacter*, and  
494 *Acinetobacter*, respectively. In this analysis, Type I, II, III, and IV RMS were identified in  
495 GNB isolates with carbapenem and polymyxin co-resistance. As expected, the most common  
496 system was Type II RMS, which has an important function in destroying foreign DNA<sup>38</sup>.  
497 The Type II system was found in almost all isolates except four isolates (*A. colistiniresistens*  
498 NIPH1859, *E. kobei* MGH244, *E. roggkampii* DSM 16690, and *K. pneumoniae*  
499 CFSAN044564) in which no restriction enzyme genes were found (Table S5). Type I  
500 restriction enzymes was the second most common system identified. Conversely, Type III  
501 and IV were the least common systems amongst the isolates.

502 The Type I system was identified in seven *E. coli* and six *K. pneumoniae* isolates (Table S5).  
503 Two *E. coli* isolates MG1655 and MCR1\_NJ both honoured chromosomal Type I, II and IV  
504 systems. These two isolates had the same Type II system both comprising MTases,  
505 *M.Eco4255Dcm* and *M.EcoKII*, albeit with different motifs/recognition sequence of CCWGG  
506 and ATGCAT, respectively (Table S5). Furthermore, these isolates had methyl directed  
507 restriction enzymes Type IV system with unknown recognition sequences; except for  
508 *EcoKMcrA* in MG1655 that had a known sequence (YCGR). Only *E. coli* MG1655 and  
509 MCR-1\_NJ had a complete set of chromosomal Type I system with a RE, MTase, and

510 specificity subunit, while other *E. coli* isolates only had either MTases or restriction enzyme.  
511 However, they had the same recognition sequence. For *K. pneumoniae* isolates, KP-6884 and  
512 KL027 were the only isolates having Type I, II and III MTases (Table S5).

513 All *K. pneumoniae* isolates with the Type I system had both MTase and specificity subunit.  
514 *K. pneumoniae* CFSAN044571, QS17-0029 and KL027 had chromosomal MTase  
515 (*M.Kpn928I*) and specificity subunit (*S.Kpn1420II*), while the same RMS was observed on  
516 the plasmid of *K. pneumoniae* CFSAN044563 and CFSAN044569. Furthermore, *K.*  
517 *pneumoniae* QS17-0029 also had a chromosomal RE (*EcoR124II*) and two more MTases;  
518 *M.EcoprrI* (chromosomal) and *M.Kpn234I* (from plasmid), which were missing in other  
519 isolates. The Type I system in *K. pneumoniae* KP-6884 was found on a plasmid hosting a  
520 MTase, *M.Kpn928I*, and a specificity subunit, *S.Kpn1420II*, that shared the same recognition  
521 sequence, ACGNNNNNNCTG.

522 Type II restriction enzymes were the most common restriction enzymes in bacterial. The  
523 Type II MTases included plasmid-mediated *M.Kpn34618Dcm* in *K. pneumoniae* and  
524 chromosomal *M.EcoE455Dcm* in *E. coli* isolates, sharing the same recognition site, CCWGG  
525 (Table S5). The *M.Kpn34618Dcm* was found in all *K. pneumoniae* isolates (n = 6). However,  
526 this MTase was coupled with plasmid-borne *M.EcoRII* in *K. pneumoniae* CFSAN044572 and  
527 CFSAN044573, with the same recognition site (Table S5). Furthermore, *K. pneumoniae*  
528 CFSAN044569 had two REs, viz *EarI* and *Eco128I*, and four MTases, (*M.EcoRII*,  
529 *M.Kpn34618Dcm*, *M1.EarI* and *M2.EarI*). The *EarI*, *M1.EarI* and *M2.EarI* MTases shared  
530 recognition sequences, while *Eco128I*, *M.EcoRII* and *M.Kpn34618Dcm* had different motifs  
531 (Table S5). For *E. coli* isolates, *M.EcoE455Dcm* was always coupled with *M.EcoKII*, with  
532 the recognition sequence ATGCAT in the Type II system. Interestingly, the chromosomal  
533 Type II *M.EcoE455Dcm* in *E. coli* Ec36 was coupled with a RE, *Eco128I*, and two copies of

534 *M.EcoRII* MTases (Table S5). Furthermore, the Type II system in *E. coli* W11 was mobilised  
535 by a plasmid, with the same recognition sequences as that of the *M.EcoRII* MTases.

536 Types III and IV RMSs were the least common among our isolates. The Type III system was  
537 found in *K. pneumoniae* KP-6884 and QS17-0029, consisting of chromosomal *M.Kpn1420I*  
538 and *M.Kpn34618Dcm*, respectively. Type IV system was found in *E. coli* EC-129 and  
539 MRC1\_NJ, consisting of plasmid MTase *EcoAPECGmrSD* and chromosomal *EcoKMrr*,  
540 respectively. The Type III MTases have different motifs, while Type IV lacks the recognition  
541 sequences (Table S5)

## 542 **3.6 Phylogenomic analyses of included GNB.**

### 543 **3.6.1 Clonal lineages of carbapenem and colistin-resistant GNB**

544 Isolates in this study belonged to over 100 sequence types (STs). Figure 6 presents STs that  
545 have three or more isolates. Overall, the most common clones were *K. pneumoniae* ST258 (n  
546 = 56), followed by *E. coli* ST156 (n= 35), *A. baumannii* ST191 (n = 34), ST101 (n = 29) and  
547 *K. pneumoniae* ST45 (n = 21). *A. baumannii* ST191 was only reported in Seoul, South Korea  
548 <sup>12</sup>. *K. pneumoniae* ST258 was the most prevalent clone in Greece (n = 50), followed by *E.*  
549 *coli* ST156 in China (n = 33) and *A. baumannii* ST191 in Seoul (n = 34).

550 Countries such as Portugal, Greece, USA, and India likewise presented diverse clonal  
551 lineages for GNB with co-resistance to carbapenem and colistin (Table S2\_F). In terms of  
552 diversity across countries, clones such as *K. pneumoniae* ST15 (n = 10) was detected in seven  
553 countries, *K. pneumoniae* ST101 (n = 23) and *K. pneumoniae* ST258 (n = 17) were detected  
554 in five and four countries, respectively (Table S2\_F). Furthermore, none of these clones were  
555 reported in animal samples (Table S7). Although carbapenem and colistin co-resistance was  
556 not commonly reported in African countries, Libya reported MDR *K. pneumoniae* ST101 (n  
557 = 6) and one MDR *A. baumannii* ST101. *K. pneumoniae* Kpn918 and Kpn926 of ST258 from



558 unknown sources were found in the United States, harbouring *bla*<sub>KPC-2</sub> on IncFIIK plasmids.  
559 Twelve *K. pneumoniae* ST147 clones with unknown sources were reported in Greece (n = 5)  
560 and Spain (n = 7) while three isolates of the same clone were from human samples in India (n  
561 = 2) and Pakistan (n = 1) (Table S2\_F). *K. pneumoniae* ST14 (n = 11) isolates with  
562 carbapenem and polymyxin co-resistance from human samples were detected in the United  
563 Arab Emirates, particularly in Dubai <sup>73</sup>. *K. pneumoniae* ST14 was also reported in human  
564 samples in India (n = 6).

565 In contrast to *K. pneumoniae* clones, *E. coli* clones did not display high inter-country  
566 clonality (Table S2\_F). *E. coli* ST156 and *E. coli* ST167 were each reported in three  
567 countries. *E. coli* ST156 was more prevalent in animal samples (n = 10) whilst *E. coli* ST167  
568 (n=4) was found in human samples and *E. coli* WF5-38 (n=1) was from animal samples.  
569 China reported the most cases of carbapenem and colistin co-resistance in GNB, resulting in  
570 more diverse clones (Table S2\_F). Plasmid replicons associated with carbapenem and colistin  
571 ARGs for these clones were also diverse. Of the 158 *E. coli* isolates that were reported in the  
572 country, most were members of *E. coli* ST156 (n = 33), followed by *E. coli* ST10 (n = 8). The  
573 remaining ST(s) only included about three isolates or less. *E. coli* ST156 was more prevalent  
574 in animal samples, accounting for 77.1% (n = 27/ 33) isolates (Table S2\_F).

575 In addition to China, *E. coli* BJ10 of ST156 was also reported from human samples in USA.  
576 This clone harboured *mcr-1* and *bla*<sub>NDM-5</sub> on IncX<sub>3</sub> and IncL plasmids, respectively. *K.*  
577 *pneumoniae* MAH-3 ST156 from humans in France also harboured *bla*<sub>OXA</sub> on an IncI<sub>2</sub>  
578 plasmid replicon. *E. coli* ST10 clone was detected in ten *E. coli* isolates in China (n = 8) and  
579 USA (n = 2). China reported two animal and six human samples, while USA reported two  
580 isolates from humans infected with the *E. coli* ST10 clone. *E. coli* GZ2a in USA, and three *E.*  
581 *coli* ST10 strains in China harboured *mcr-1* and *bla*<sub>NDM-5</sub> respectively on an IncX<sub>3</sub> and IncI<sub>2</sub>  
582 plasmid. Notably, new *E. coli* clonal lineages were identified in *E. coli* WFA16004,



583 WFA16019 and WFA16061, isolated from animals in China. These isolates harbored *mcr-I*  
584 and *blaNDM<sub>1/4</sub>* genes. Unfortunately, plasmid types which were associated with these ARGs  
585 are unknown<sup>67</sup>.

586 Portugal reported a total of 25 *K. pneumoniae* ST45 isolates from human samples which  
587 harbored *mcr-I* on IncX<sub>4</sub> plasmid (Table S2\_A). Carbapenem and colistin co-resistance was  
588 not commonly reported in *Pseudomonas sp.*, which were all detected from human samples.  
589 Ten of these were reported in Turkey i.e., *P. aeruginosa* ST235 (n = 7) and *P. aeruginosa*  
590 ST3078 (n = 3). One was reported in India, viz. *P. aeruginosa* ST235, and the last one, *P.*  
591 *aeruginosa* ST3357, was reported in Japan (Table S2\_F).

### 592 **3.6.2 Phylogenetic analyses of MDR GNB**

#### 593 **3.6.2.1 Phylogenetic analyses of *K. pneumoniae* and *E. coli* isolates**

594 Mapping the resistance dynamics, virulomes and RMS of *K. pneumoniae* isolates from  
595 human hosts against their genome-based phylogeny showed that species from the genus  
596 *Klebsiella* are highly resistant to antibiotics (Figure 7A). However, these isolates do not  
597 possess a rich virulome and RMS. The phylogenetic tree on Figure 7A, based on *K.*  
598 *pneumoniae* genomes revealed three different clades, presented with different colours;  
599 Maroon (clade I), blue (clade II) and green (clade III) (Figure 7A). Clade I consisted of *K.*  
600 *pneumoniae* ST15 CFSAN04465 and *K. pneumoniae* ST147 CFSAN04469 from Pakistan, as  
601 well as *K. pneumoniae* ST15 MLST15 from USA. *K. pneumoniae* ST15 CFSAN04465 and  
602 MLST15 clustered together, but showed little similarities on their resistance profiles and  
603 virulomes. However, these isolates harbour the same RMS, including MTase and motifs.  
604 Interestingly, *K. pneumoniae* MLST15 and *K. pneumoniae* CFSAN04469 of a different  
605 clone (*K. pneumoniae* ST147) showed significant similarities in their resistance profiles and  
606 virulence determinants. Moreover, these isolates had the same capsular predictions.

607 *K. pneumoniae* CFSAN04472 and CFSAN04473 clustered together under clade II (Figure  
608 7A). These isolates were isolated in Pakistan from a patient, both belonged to the *K.*  
609 *pneumoniae* ST101 clone and showed similar resistance profiles except that *K. pneumoniae*  
610 CFSAN04473 harboured *bla<sub>OXA-48</sub>* and lacked *bla<sub>NDM-1</sub>*. Furthermore, these isolates showed  
611 the same virulome, methylome, plasmids and capsular structures. The only difference  
612 between these isolates is that *K. pneumoniae* CFSAN04472 was isolate from blood and *K.*  
613 *pneumoniae* CFSAN04473 from catheter tip<sup>16</sup>. Clade III was the most diverse in terms of  
614 geographical location comprising of isolates from Pakistan (n = 3), Japan (n = 1), Thailand (n  
615 = 1), Vietnam (n = 1) and Italy (n = 1). Overall, *K. pneumoniae* isolates showed different  
616 resistomes, virulomes and methylomes. *K. pneumoniae* HS11286 and CFSAN04463  
617 belonged to different clones viz. *K. pneumoniae* ST3130 and *K. pneumoniae* ST11,  
618 respectively. These isolates showed the same RMS and virulome despite their different  
619 clonality. However, their resistance profiles were different (Figure 7A). *K. pneumoniae*  
620 CFSAN04463, CFSAN04464 and PI15KP27 belonged to different STs, but showed high  
621 similarities in their resistance profiles, with different virulomes and methylomes (Figure  
622 7A).

623 Figure 7B depicts the evolution and resistome dynamics, virulomes and RMS of *E. coli*  
624 isolates based on genome sequences. Isolates were all from human samples. Overall, grey  
625 blocks on the *E. coli* resistome analyses is more dominant than the red blocks, meaning the  
626 *E. coli* isolates are not as highly resistant as the *K. pneumoniae* isolates (Figure 7A & B).  
627 However, there is an interesting exception for three *E. coli* isolates, viz. EC-129, EC17GD31  
628 and WCHEC-LL-123, which harboured more ARGs besides those of carbapenems, colistin  
629 and tigecycline (Figure 7B). These species were all from human samples and were isolated  
630 from Japan (EC-129), China (WCHEC-LL-123), and Vietnam (EC17GD31). Interestingly, *E.*

631 *coli* isolates revealed a more diverse virulome profiles as compared to those of *K.*  
632 *pneumoniae* MDR isolates (Figure 7B).

633 The genome phylogeny of *E.coli* also showed three distinct clades shown by Maroon (clade  
634 I), blue (clade II) and green (clade III). Clade I comprises of isolates from China (n = 2),  
635 France (n = 2), Portugal (n = 1), USA (n = 1) and Vietnam (n = 1). Clade II and III consist  
636 of one isolate each. *E. coli* EC129 and 5CRE51 of clade II were respectively isolated from  
637 Japan and Taiwan. Although most of the *E.coli* isolates clustered under clade I, they showed  
638 very distinct methylome, virulome, plasmids and resistance profiles. All isolates belonged to  
639 a distinct clone, except for *E. coli* ST1288 WI1 and WI2 from France (Figure 7B).  
640 Furthermore, these two isolates had similar virulence factors. *E. coli* WI2 of ST1288 and *E.*  
641 *coli* Ec36 of ST644 had the same virulome and similar resistance profiles. *E. coli* MCR1\_NJ  
642 (ST405) and *E. coli* EC17GD31 (ST457) revealed similar resistance profiles and RMS, where  
643 MCR1\_NJ had a Type IV restriction system that was rare in the included isolates.  
644 Furthermore, the two isolates showed similar virulomes, except that *iss* and *iutA* were  
645 missing in *E. coli* MCR1\_NJ (Figure 7B).

#### 646 **3.6.2.2 Plasmids evolutionary analyses**

647 Figure 8A shows phylogenetic analysis of plasmids associated with carbapenemases, while  
648 Figure 8B shows that of plasmids associated with polymyxin resistance. Both phylogenies  
649 revealed six distinct clades. On Figure 8A, clade I consisted of four *E. coli* plasmids from  
650 human samples which belonged to different STs and harboured different plasmids. However,  
651 two of these *E. coli* isolates did not have plasmids replicons (Figure 8A). Clade II showed a  
652 bootstrap of 100 and consisted of *E. coli* and *K. pneumoniae* plasmids. It is worth noting that  
653 although strains in clade II belonged to different STs, they harbour IncX<sub>3</sub> plasmids, except for  
654 *K. pneumoniae* DHQP1605752 that had A/C plasmid. Furthermore, the lower subgroup of

655 this clade consisted of four *E. coli* isolates (P768MEM-011, P788A-032, P785MEM and  
656 P744T) from animal samples which clustered tightly (Figure 8A).

657 Clade III was the most diverse clade consisting of carbapenemase-associated plasmids from  
658 *K. pneumoniae* (n = 5), *E. coli* (n = 2), *E. roggenkampii* (n = 1) and *E. hormaechei* (n = 1).  
659 These plasmids belonged to different STs and were isolated from different locations.  
660 However, plasmids in clade III were all from human samples. *K. pneumoniae* GD4 and SZ03  
661 harboured IncX<sub>3</sub> plasmid, which was more prevalent in clade II. However, this plasmid  
662 carried *bla*<sub>KPC</sub> and *bla*<sub>NDM</sub> gene in *K. pneumoniae* GD4 and SZ03, respectively. Clades IV  
663 and V were singletons consisting of plasmids from *E. hormaechei* Ec61 (clade IV) and *E.*  
664 *cloacae* (clade V) from human samples. Lastly, clade VI had one isolate from human origin  
665 and one from animals with unknown sequence types (Figure 8A).

666 Figure 8B shows phylogeny, resistance profiles, RMS and virulome profiles of plasmids that  
667 mobilize the *mcr-1* gene. In contrast with carbapenemase-borne plasmid-based phylogeny,  
668 this phylogeny comprised of a more diverse clonality. All plasmids in clade I belong to their  
669 unique clones. *K. pneumoniae* SZO4 and *K. pneumoniae* SZO3 in clade III plasmids (IncX<sub>4</sub>)  
670 belong to the same clone ST25 (Figure 8B). IncHI2 plasmids were found in four *E. coli*  
671 isolates of different clones. Two of these plasmids were detected in two *E. coli* WCHEC-  
672 LL123 and XG-E1 isolated from animal samples. However, these isolates belong to *E. coli*  
673 ST206 and *E. coli* ST466, respectively (Figure 8B).

#### 674 **4. Discussion**

675 Increasing antimicrobial resistance in GNB continue to challenge public health globally.  
676 Carbapenem and polymyxin co-resistance is even more worrying as these antibiotics are  
677 “last-line” treatment therapy for GNB infections. Here, we present in-depth genomic

678 epidemiology, epigenomics, virulome and mobilome analysis of MDR GNB using a One  
679 Heath concept, globally.

680 Various countries evidently showed that carbapenem and polymyxin co-resistance  
681 disseminate among humans, animals, and the environment. In addition to high numbers of  
682 carbapenem and colistin co-resistant isolates, China presented the most diverse specimen  
683 from various sources, as well as multiple clones (Table S2\_A). The observed outcomes could  
684 be due to the over-prescription of antibiotics in health facilities and overuse of antimicrobials  
685 for animal growth and wellness <sup>74</sup>.

686 Although GNB in humans have been the most common reservoirs for antibacterial resistance  
687 genes, this trend is now increasing in animals, particularly in swine and poultry in developing  
688 countries <sup>75</sup>. Thus, co-resistance to carbapenem and colistin in GNB have been outspread  
689 globally, affecting both human health facilities and veterinary medicine <sup>1,76</sup>. Countries such as  
690 China, Japan, USA, and Italy have reported carbapenem and colistin co-resistance in both  
691 human and animals' samples. Carbapenem and colistin co-resistance in bacteria from animals  
692 is of great concern in Asian countries, particularly in China <sup>32,77</sup>. Previous studies showed that  
693 antibiotic resistance in livestock drastically increased in the past two decades in the North-  
694 eastern parts of China and India <sup>75</sup>. This is due to the increasing demands of meat in  
695 developing countries. Such countries frequently use antibiotics to boost animal wellbeing and  
696 growth to elevate meat production <sup>75,78</sup>. Even though Asia and Europe reported high numbers  
697 of carbapenem and colistin co-resistance, European countries reported less numbers from  
698 animal samples, because Europe and the United States prohibited the use of antibiotics as  
699 growth promoters in animals <sup>78</sup>. Environmental isolates were only reported in two countries,  
700 China, and Germany. These were from farms, slaughterhouse, and sewage systems <sup>67,71,79</sup>  
701 which suggest that carbapenem and colistin co-resistance may not be common in  
702 environmental samples as it is in isolates from animal and human origin.

703 *K. pneumoniae* are commonly known for nosocomial infections, which are often untreatable  
704 and fatal <sup>3,22</sup>. As expected, our results revealed that *K. pneumoniae* isolates were commonly  
705 reported for carbapenem and colistin co-resistance globally (n = 535) (Figure 2A). Other  
706 GNB species such as *E. coli*, *P. aeruginosa* and *A. baumannii* are also implicated in  
707 nosocomial infections <sup>2,4</sup>. Additionally, Enterobacter spp. such as *E. cloacae* and *E.*  
708 *hormaechei* have recently been identified as important pathogens in health facilities <sup>80</sup>. *E.*  
709 *cloacae* isolates are naturally resistant to many antibiotics including first-generation  
710 cephalosporins, ampicillin, and amoxicillin, which makes them multi-antibiotic resistant <sup>80</sup>.  
711 This explains their rich resistance profiles found alongside carbapenem and colistin co-  
712 resistance (Figure 4A &B).

713 Furthermore, these isolates harboured the major plasmid replicons reported in this study viz.,  
714 IncI, IncX IncF, and IncHI (Figure 5A &B), which may play a role in the easy transmission  
715 of ARGs. *P. aeruginosa* and *A. baumannii* isolates revealed low ARG profiles and/or lack of  
716 plasmids, virulence genes, RMS and capsular polysaccharides. This suggests that some *P.*  
717 *aeruginosa* and *A. baumannii* isolates are not MDR and their infections may still be treated  
718 successfully with antibiotics. Our results revealed that for all *P. aeruginosa* and *A. baumannii*  
719 with carbapenem and colistin co-resistance, there were no plasmid-borne *mcr* genes, but only  
720 chromosomal resistance mechanisms were identified (Table S2\_A). This corroborates the  
721 lack of plasmids in these isolates.

722 The reported isolates belong to various clones. The most common clones with carbapenem  
723 and colistin co-resistance were *E. coli* ST156 in China, *K. pneumoniae* ST258 in Greece and  
724 *A. baumannii* ST191 in Korea (Table S2\_F). The international *K. pneumoniae* ST258 was  
725 reported in more than one country, indicating its easy transmissibility and wider distribution.  
726 This is an international clone that is continually being reported globally <sup>22</sup>. This means core  
727 resistance genes will be easily disseminated between bacteria, which makes the fight against

728 antibiotic resistance in GNB, particularly *K. pneumoniae* of ST285, almost impossible to win.  
729 Furthermore, having this promiscuous clone now involved in co-resistance to the two most  
730 important antibiotics calls for the development of effective treatment therapies or even new  
731 drugs.

732 *E. coli* isolates belonged to multiple STs, but *E. coli* ST156 was the most common (Table  
733 S2\_F). This epidemic clone is related to the spread of *mcr-I*, NDM and CTX-M<sup>81</sup>, which is  
734 also supported by our results where *E. coli* ST156 isolates from human and animals were  
735 found to carry *mcr-I* and *bla<sub>NDM</sub>* ARGs in China and USA (Table S2\_A). Furthermore, new  
736 *E. coli* STs from animals have been reported in China<sup>62</sup>. The emergence of new clones and  
737 high numbers of animal cases suggests that GNB are continually evolving and the crisis of  
738 carbapenem and colistin co-resistance is undoubtedly growing. This also suggest that there  
739 may be an increasing use of antibiotics in animals for commercial and economic benefits. *A.*  
740 *baumannii* ST191 was another common clone in our analyses. It was prevalent in *K.*  
741 *pneumoniae* isolates and was only identified in Korea<sup>12</sup>. This clone carried OXA-23 along  
742 with the disrupted *mgrB* gene for carbapenem and colistin resistance, respectively (Table  
743 S2\_A).

744 Many studies suggested combination therapies as treatment alternatives due to increasing  
745 ESBLs, carbapenemases, and now polymyxin resistance in GNB<sup>7,13</sup>. Unfortunately, our  
746 results revealed that isolates with carbapenem and colistin co-resistance also developed  
747 resistance against other antibiotics including tigecycline, aminoglycosides, chloramphenicol,  
748 and sulfamethoxazole (Figure 4), therefore challenging combination therapies as treatments.  
749 Resistance to various antibiotics, in addition to the rich virulence factors, methylome and  
750 capsular polysaccharides (in *K. pneumoniae*) explains the success of *K. pneumoniae* to  
751 bypass the host's immune defences, making their infections more challenging to treat/manage

752 <sup>3</sup>. NDM, OXA-48 and KPC were previously reported as the most widely distributed  
753 carbapenemases, with KPC being the most prevalent in *K. pneumoniae* <sup>3</sup>.

754 However, our results revealed that NDM and OXA-48 were predominantly associated with  
755 polymyxin resistance globally. An increase in the production of OXA-48 in *K. pneumoniae*  
756 isolates was reported in 2019 <sup>82</sup>, which was also observed in our analyses where OXA-48 was  
757 the most most prevalent carbapenemase, followed by NDM (Figure 3B). Similar to other  
758 isolates reported in India, Table S2\_A showed that *K. pneumoniae* isolates in United Arab  
759 Emirates (Dubai) also produced OXA-48 and NDM. However, the polymyxin resistance  
760 mechanism for these isolates were not detected. KPC was previously reported as the most  
761 prevalent carbapenemases in *K. pneumoniae* <sup>4</sup>. However, in this study OXA-48 was detected  
762 more than KPC globally. OXA-48 was predominant in *K. pneumoniae* isolates from India.  
763 OXA-48 was reported to have lower activity against carbapenem but, showed increased  
764 activity when it co-exists with ESBLs <sup>19</sup>. Our result showed that OXA-48 was coupled with  
765 ESBLs in most isolates (Figure 4), which supports their resistance to carbapenems.

766 Colistin resistance was through plasmid mediated *mcr-1* and/or chromosomal mutation.  
767 Furthermore, Table S2\_A shows that *mcr-1* is carried by different plasmids, suggesting a  
768 rapid and high dissemination of this gene, thus increasing colistin resistance in bacteria.  
769 Unfortunately, these plasmids have spread to carbapenemase-producing isolates, resulting in  
770 MDR bacteria. Resistance through *crrB* gene was the least common mechanism for polymyxin  
771 resistance. This mechanism has recently been reported as another pathway to polymyxin  
772 resistance in GNB <sup>83</sup>. This suggests that bacteria are continuously evolving, resulting in the  
773 emergence of new resistance mechanisms.

774 DNA methylation play a crucial role in the regulation of gene expression and it is part of  
775 bacterial defence systems<sup>37</sup>. Bacteria implement systems that are very crucial in destroying



776 foreign DNA material through recognition sequences<sup>35,37</sup>. Most *K. pneumoniae* isolates share  
777 the same methylation signatures as *E. coli* isolates, suggesting that DNA & MGEs can be  
778 easily exchanged between the two species, thus giving them an advantage in acquiring  
779 resistance and virulence to more antibiotics and hosts, respectively. Likewise, *mcr*'s ability to  
780 easily disseminate as compared to other mechanisms is hinged on its association with MGEs.  
781 This suggest that plasmids that carry the *mcr-1* gene may have the same recognition  
782 sequences as the host, which makes their transmission between bacteria a success.

783

784 The MGEs that carry carbapenem and colistin ARGs are also associated with a diversity of  
785 virulence genes in MDR GNB. Bacteria also produce polysaccharide capsules for their  
786 protection, which are one of the most important virulence factors in pathogens<sup>38</sup>. Bacterial  
787 virulence genes/factors enable them to bypass the hosts' defence systems<sup>84</sup>. MGEs, RMSs,  
788 virulence genes and capsules all contribute to AMR in GNB. The most common mobile  
789 elements were plasmids, followed by insertion sequence (IS), transposon (Tnp) and class I  
790 integrons (Table S3\_A). IncX plasmids were previously identified as the main carrier of  
791 carbapenem and colistin ARGs among GNB<sup>12,66</sup>. In line with this, our study revealed that  
792 IncX was the most common MGE in 43 countries, carrying carbapenemases and *mcr-1* gene  
793 (Table S3\_B). China, with the highest reported numbers of carbapenem and colistin co-  
794 resistant isolates (n = 171), presented diverse plasmids from various sources (Figure 2C).  
795 Surprisingly, USA (n = 18), Japan (n = 15), and Vietnam (n = 6) were among countries with  
796 the most diverse plasmid replicons despite their low rates of carbapenem and colistin co-  
797 resistance. However, this was expected for Japan as it presented a diverse species distribution  
798 like China (Figure 2A). The diverse plasmid repertoire in USA and Vietnam could suggest  
799 that there are chances of increasing rates of plasmid borne ARGs within these countries. The  
800 insertion sequence IS903B was the most common and prevalent in *K. pneumoniae* isolates (p

801 = 0.362). This IS was said to be one of the main elements that facilitated *mcr-8*'s  
802 dissemination in GNB<sup>85</sup>. The co-occurrence of the *mcr-8* with NDM was previously  
803 documented in *K. pneumoniae*<sup>85</sup>.

804 Colistin resistance has long been occurring through chromosomal mutations. However, the  
805 emergence of plasmid-mediated *mcr* genes has put more strain to public health because such  
806 genes are easily transmitted than chromosomal resistance mechanisms<sup>24</sup>. As previously  
807 stated<sup>86</sup>, our study revealed that *mcr* co-occurrence with carbapenemases were commonly  
808 identified in *E. coli* and showed low detections in *K. pneumoniae*. Further, *mcr* was not  
809 identified in any *A. baumannii* and *P. aeruginosa* isolates. This evidently explains the low  
810 rates of colistin resistance in *A. baumannii* and *P. aeruginosa* isolates.

811 We showed that carbapenem and colistin co-resistant *K. pneumoniae* isolates from human  
812 samples clustered under three distinct clades. Likewise, carbapenem and colistin co-resistant  
813 *E. coli* isolates resulted in three clades, with clade I comprising of more isolates while clades  
814 II and III comprised of single isolates (Figure 7A & B). In addition to carbapenem and  
815 colistin ARGs, *K. pneumoniae* and *E. coli* showed a rich resistance profile, confirming their  
816 potential as carbapenemase-producing and polymyxin resistant MDR bacteria. *K.*  
817 *pneumoniae* ST101 isolates from the same location showed the same plasmids, virulence  
818 genes, methylome and capsules. However, their resistance profiles were not entirely identical  
819 (Figure 7A). Contrarily, *K. pneumoniae* ST15 isolates of clade I of the *K. pneumoniae*  
820 phylogeny had differences in their resistance profiles and virulomes. This suggests that  
821 bacterial resistomes and virulence determinants are independent of their sequence types,  
822 which could be due to the presence of different plasmids in the same clones.

823 Furthermore, these isolates showed the same RMS, capsular polysaccharides, and were  
824 isolated from different countries. Additionally, this proves that their RMS are also

825 independent from their location of isolation. Having the same RMS allows them to easily  
826 transmit genetic material, given that they have the same recognition sequences. Likewise,  
827 phylogenetic analyses based on *E. coli* genomes also support the finding that bacterial  
828 virulomes and RMS are independent of clonality (STs), source, and geographical location  
829 (Figure 7B). These analyses revealed that genome sequences provide higher resolution than  
830 STs, and thus show a better relationship between isolates than STs. Therefore, whole genome  
831 sequences should be used to type or distinguish clones in epidemiological studies and  
832 outbreaks.

833 Phylogenetic analyses based on plasmids demonstrated that with a few exceptions, the same  
834 plasmids carrying the same carbapenemase (Figure 8A) and colistin (Figure 8B) ARGs,  
835 mostly cluster together regardless of their sequence type and source of isolation. The  
836 observed patterns of clustering suggest that plasmids associated with the same ARGs may be  
837 genetically related. This is supported by our results that show IncX plasmids as the most  
838 common plasmid to host both carbapenemase and polymyxin resistance genes. Hence, the  
839 presence of same plasmids in different species indicates that plasmids are constantly  
840 transmitted among GNB.

#### 841 ***Conclusion, recommendations, limitations, & future perspectives***

842 One of the major global crises currently facing human and veterinary medicine is increasing  
843 antibiotics resistance in bacteria. High demands and over prescription of antibiotics have  
844 resulted in an increasing burden of bacterial antibiotic resistance globally. An even more  
845 worrying problem is the emergence of bacterial resistance against last-resort antibiotics such  
846 as carbapenems and polymyxins. This was commonly reported in GNB isolates from animal,  
847 human, and environmental sources. Although carbapenem and polymyxin co-resistance was  
848 common in *K. pneumoniae*, a stronger association existed in *E. coli* isolates from animal

849 samples. Countries with high demand for meat production viz., China, India, and Italy,  
850 reported more cases of carbapenem and polymyxin resistance in animals.

851 Continuous dissemination carbapenem and polymyxin ARGs is supported by various MGEs,  
852 RMS systems and rich virulence determinants. Reported MGEs were integrons, insertion  
853 sequences, transposons, and plasmids. These were associated with plasmid-borne *mcr-1* that  
854 confers resistance to colistin and with plasmid-borne carbapenemases such as OXA, NDM,  
855 KPC, IMP, GES-5, and VIM. A very high number of clones were reported globally for GNB  
856 with carbapenem and polymyxin co-resistance. The most common clones were *E. coli* ST156  
857 in China, *K. pneumoniae* ST258 in Greece and *A. baumannii* ST191 in Korea. Evidently,  
858 these clones each showed their unique resistance profiles, RMS, capsules, virulomes and  
859 MGEs, supporting their independent evolutionary trajectories. A new *E. coli* clone was  
860 reported in China from animal samples. Such clones need to be studied further.

861 The lack of available genome and/or plasmid accession numbers from published articles  
862 limited our bioinformatics studies. Our study showed that there is an urgent need to institute  
863 stricter regulations on antibiotic stewardship, prescription, and sales to prevent a return to the  
864 pre-antibiotic era as the global dissemination of these MDR strains can take many lives.  
865 Further, new antibiotics or new treatment therapies that can combat antimicrobial resistance  
866 are urgently needed. Furthermore, more genomic investigations are needed to map current  
867 resistance mechanisms and trends globally to facilitate evidence-based clinical and  
868 epidemiological decisions in future.

869 **Availability of material and data:** Supplementary data is available and included as Tables  
870 and Figures in this manuscript.

871 **Acknowledgements:** None

872 **Funding:** None

873 **Transparency declaration:** The authors declare no conflict of interest.

874 **Author contributions:** Study design and supervision (Dr. J.O.S); Bioinformatic/statistical  
875 analyses (W.T.R & Dr. J.O.S); Write-up (W.T.R & J.O.S); Editing, revision, and formatting  
876 (Dr. J.O.S).

## 877 5. References

- 878 1. Delgado-Blas, J. F., Ovejero, C. M., Abadia-Patino, L. & Gonzalez-Zorn, B. Coexistence of mcr-1 and  
879 blaNDM-1 in Escherichia coli from Venezuela. *Antimicrob. Agents Chemother.* **60**, 6356–6358 (2016).
- 880 2. Pedersen, T. *et al.* Spread of plasmid-encoded NDM-1 and GES-5 carbapenemases among extensively  
881 drug-resistant and pandrug-resistant clinical enterobacteriaceae in durban, South Africa. *Antimicrob.*  
882 *Agents Chemother.* **62**, 1–12 (2018).
- 883 3. Kopotsa, K., Mbelle, N. M. & Osei Sekyere, J. Epigenomics, genomics, resistome, mobilome, virulome  
884 and evolutionary phylogenomics of carbapenem-resistant Klebsiella pneumoniae clinical strains.  
885 *Microb. Genomics* **6**, (2020).
- 886 4. Kopotsa, K., Osei Sekyere, J. & Mbelle, N. M. Plasmid evolution in carbapenemase-producing  
887 Enterobacteriaceae: a review. *Ann. New* **1457**, 61–91 (2019).
- 888 5. Serra-Burriel, M. *et al.* Impact of multi-drug resistant bacteria on economic and clinical outcomes of  
889 healthcare-associated infections in adults: Systematic review and meta-analysis. *PLoS One* **15**,  
890 e0227139 (2020).
- 891 6. Wang, R. *et al.* The prevalence of colistin resistance in Escherichia coli and Klebsiella pneumoniae  
892 isolated from food animals in China: coexistence of mcr-1 and blaNDM with low fitness cost. *Int. J.*  
893 *Antimicrob. Agents* **51**, 739–744 (2018).
- 894 7. Osei Sekyere, J. & Reta, M. A. Genomic and Resistance Epidemiology of Gram-Negative Bacteria in  
895 Africa: a Systematic Review and Phylogenomic Analyses from a One Health Perspective. *mSystems* **5**,  
896 (2020).
- 897 8. Sekyere, J. O. & Reta, M. A. Global evolutionary epidemiology, phylogeography and resistome  
898 dynamics of Citrobacter species, Enterobacter hormaechei, Klebsiella variicola, and Proteaceae clones: A  
899 One Health analyses. *medRxiv* (2020).
- 900 9. Tacconelli, E. *et al.* Discovery, research, and development of new antibiotics: the WHO priority list of  
901 antibiotic-resistant bacteria and tuberculosis. *Lancet. Infect. Dis.* **18**, 318–327 (2018).
- 902 10. World Health Organization. *Global Priority List Of Antibiotic-Resistant Bacteria To Guide Research,*  
903 *Discovery, And Development Of New Antibiotics.* WHO (2017).
- 904 11. Beyrouthy, R. *et al.* MCR-1 and OXA-48 In Vivo Acquisition in KPC-Producing Escherichia coli after  
905 Colistin Treatment. *Antimicrob. Agents Chemother.* **61**, AAC.02540-16 (2017).
- 906 12. Du, H., Chen, L., Tang, Y.-W. & Kreiswirth, B. N. Emergence of the mcr-1 colistin resistance gene in  
907 carbapenem-resistant Enterobacteriaceae. *Lancet. Infect. Dis.* **16**, 287–288 (2016).
- 908 13. Sekyere, J. O. Current state of resistance to antibiotics of last-resort in South Africa: A review from a  
909 public health perspective. *Front. Public Heal.* **4**, 209 (2016).
- 910 14. Osei Sekyere, J., Maningi, N. E., Modipane, L. & Mbelle, N. M. Emergence of mcr-9.1 in ESBL-  
911 producing Clinical Enterobacteriaceae in Pretoria, South Africa: Global Evolutionary Phylogenomics,  
912 Resistome and Mobilome. *mSystems* **5**, e00148-20 (2020).
- 913 15. Mmatli, M., Mbelle, N. M., Maningi, N. E. & Osei Sekyere, J. Emerging Transcriptional and Genomic  
914 Mechanisms Mediating Carbapenem and Polymyxin Resistance in Enterobacteriaceae: a Systematic

- 915 Review of Current Reports. *mSystems* **5**, (2020).
- 916 16. Mediavilla, J. R. J. R. *et al.* Colistin- and Carbapenem-Resistant *Escherichia coli* Harboring *mcr-1* and  
917 *bla*NDM-5, Causing a Complicated Urinary Tract Infection in a Patient from the United States. *MBio* **7**,  
918 5–8 (2016).
- 919 17. Somboro, A. M., Osei Sekyere, J., Amoako, D. G., Essack, S. Y. & Bester, L. A. Diversity and  
920 proliferation of metallo- $\beta$ -lactamases: a clarion call for clinically effective metallo- $\beta$ -lactamase  
921 inhibitors. *Appl. Environ. Microbiol.* **27**, AEM.00698-18 (2018).
- 922 18. Sawa, T., Kooguchi, K. & Moriyama, K. Molecular diversity of extended-spectrum  $\beta$ -lactamases and  
923 carbapenemases, and antimicrobial resistance. *J. intensive care* **8**, 13 (2020).
- 924 19. Arabaci, C., Dal, T., Basyigit, T., Genisel, N. & Durmaz, R. Investigation of carbapenemase and *mcr-1*  
925 genes in carbapenem-resistant *Klebsiella pneumoniae* isolates. *J. Infect. Dev. Ctries.* **13**, 504–509  
926 (2019).
- 927 20. Wang, Y. *et al.* Detection of mobile colistin resistance gene *mcr-9* in carbapenem-resistant *Klebsiella*  
928 *pneumoniae* strains of human origin in Europe. *J. Infect.* **80**, 578–606 (2020).
- 929 21. Kieffer, N. *et al.* Colistin-resistant carbapenemase-producing isolates among *Klebsiella* spp. and  
930 *Acinetobacter baumannii* in Tripoli, Libya. *J. Glob. Antimicrob. Resist.* **13**, 37–39 (2018).
- 931 22. Mavroidi, A. *et al.* Characterization of ST258 Colistin-Resistant, *bla*KPC-Producing *Klebsiella*  
932 *pneumoniae* in a Greek Hospital. *Microb. Drug Resist.* **22**, 392–398 (2016).
- 933 23. Jayol, A. *et al.* High-Level Resistance to Colistin Mediated by Various Mutations in the *crrB* Gene  
934 among Carbapenemase-Producing *Klebsiella pneumoniae*. *Antimicrob. Agents Chemother.* **61**, (2017).
- 935 24. Zafer, M. M. *et al.* Emergence of colistin resistance in multidrug-resistant *Klebsiella pneumoniae* and  
936 *Escherichia coli* strains isolated from cancer patients. *Ann. Clin. Microbiol. Antimicrob.* **18**, 40 (2019).
- 937 25. Jayol, A. *et al.* High-Level Resistance to Colistin Mediated by Various Mutations in the *crrB* Gene  
938 among Carbapenemase-Producing *Klebsiella pneumoniae*. *Antimicrob Agents Chemother* **61**, (2017).
- 939 26. Pillonel, T. *et al.* Resistome Analysis of a Carbapenemase (OXA-48)-Producing and Colistin-Resistant  
940 *Klebsiella pneumoniae* Strain. *Antimicrob Agents Chemother* **62**, (2018).
- 941 27. Kanwar, A. *et al.* Emergence of Resistance to Colistin During the Treatment of Bloodstream Infection  
942 Caused by *Klebsiella pneumoniae* Carbapenemase-Producing *Klebsiella pneumoniae*. *Open Forum*  
943 *Infect Dis* **5**, ofy054 (2018).
- 944 28. Lomonaco, S. *et al.* Resistome of carbapenem- and colistin-resistant *Klebsiella pneumoniae* clinical  
945 isolates. *PLoS One* **13**, e0198526 (2018).
- 946 29. Bhagirath, A. Y. *et al.* Two Component Regulatory Systems and Antibiotic Resistance in Gram-  
947 Negative Pathogens. *Int. J. Mol. Sci.* **20**, (2019).
- 948 30. Carretero-Ledesma, M. *et al.* Phenotypic changes associated with Colistin resistance due to  
949 Lipopolysaccharide loss in *Acinetobacter baumannii*. *Virulence* **9**, 930–942 (2018).
- 950 31. Choi, M.-J., Kim, S. & Ko, K. S. Pathways Regulating the *pbgP* Operon and Colistin Resistance in  
951 *Klebsiella pneumoniae* Strains. *J. Microbiol. Biotechnol.* **26**, 1620–1628 (2016).
- 952 32. Yao, X., Doi, Y., Zeng, L., Lv, L. & Liu, J. Carbapenem-resistant and colistin-resistant *Escherichia*  
953 *coli* co-producing NDM-9 and MCR-1. *The Lancet. Infectious diseases* vol. 16 288–289 (Elsevier Ltd,  
954 2016).
- 955 33. Di Pilato, V. *et al.* *mcr-1.2*, a New *mcr* Variant Carried on a Transferable Plasmid from a Colistin-  
956 Resistant KPC Carbapenemase-Producing *Klebsiella pneumoniae* Strain of Sequence Type 512.  
957 *Antimicrob. Agents Chemother.* **60**, 5612–5615 (2016).
- 958 34. Feng, S. *et al.* Co-production of MCR-1 and NDM-5 in *Escherichia coli* isolated from a colonization  
959 case of inpatient. *Infect. Drug Resist.* **11**, 1157–1161 (2018).
- 960 35. Ashcroft, M. M. *et al.* Strain and lineage-level methylome heterogeneity in the multi-drug resistant



- 961 pathogenic *Escherichia coli* ST101 clone. *bioRxiv* (2020).
- 962 36. Taylor, D. L. *et al.* Integrative analysis of gene expression, DNA methylation, physiological traits, and  
963 genetic variation in human skeletal muscle. *Proc. Natl. Acad. Sci. U. S. A.* **116**, 10883–10888 (2019).
- 964 37. Payelleville, A. *et al.* The complete methylome of an entomopathogenic bacterium reveals the existence  
965 of loci with unmethylated Adenines. *Sci. Rep.* **8**, 12091 (2018).
- 966 38. Johnston, C. D. *et al.* Systematic evasion of the restriction-modification barrier in bacteria. *Proc. Natl.*  
967 *Acad. Sci. U. S. A.* **116**, 11454–11459 (2019).
- 968 39. Wang, R., Lou, J. & Li, J. A mobile restriction modification system consisting of methylases on the  
969 IncA/C plasmid. *Mob. DNA* **10**, 26 (2019).
- 970 40. Partridge, S. R., Kwong, S. M., Firth, N. & Jensen, S. O. Mobile Genetic Elements Associated with  
971 Antimicrobial Resistance. *Clin. Microbiol. Rev.* **31**, 1–61 (2018).
- 972 41. Mostowy, R. J. & Holt, K. E. Diversity-Generating Machines: Genetics of Bacterial Sugar-Coating.  
973 *Trends Microbiol.* **26**, 1008–1021 (2018).
- 974 42. Aghapour, Z. *et al.* Molecular mechanisms related to colistin resistance in Enterobacteriaceae. *Infect.*  
975 *Drug Resist.* **12**, 965–975 (2019).
- 976 43. Baron, S. *et al.* Molecular mechanisms of polymyxin resistance: knowns and unknowns. *Int. J.*  
977 *Antimicrob. Agents* **48**, 583–591 (2016).
- 978 44. Berglund, B. Acquired resistance to colistin via chromosomal and plasmid-mediated mechanisms in  
979 *Klebsiella pneumoniae*. *Infect. Microbes Dis.* **1**, 10–19 (2019).
- 980 45. Mmatli, M., Mbelle, N. M., Maningi, N. E. & Osei Sekyere, J. Emerging Transcriptional and Genomic  
981 Mechanisms Mediating Carbapenem and Polymyxin Resistance in Enterobacteriaceae: a Systematic  
982 Review of Current Reports. *mSystems* **5**, (2020).
- 983 46. Osei Sekyere, J. & Mensah, E. Molecular epidemiology and mechanisms of antibiotic resistance in  
984 *Enterococcus* spp., *Staphylococcus* spp., and *Streptococcus* spp. in Africa: a systematic review from a  
985 One Health perspective. *Ann. N. Y. Acad. Sci.* **1465**, 29–58 (2020).
- 986 47. Hernando-Amado, S., Coque, T. M., Baquero, F. & Martínez, J. L. Defining and combating antibiotic  
987 resistance from One Health and Global Health perspectives. *Nat. Microbiol.* **4**, 1432–1442 (2019).
- 988 48. Dandachi, I., Chabou, S., Daoud, Z. & Rolain, J.-M. Prevalence and Emergence of Extended-Spectrum  
989 Cephalosporin-, Carbapenem- and Colistin-Resistant Gram Negative Bacteria of Animal Origin in the  
990 Mediterranean Basin. *Front. Microbiol.* **9**, 2299 (2018).
- 991 49. Dandachi, I., Chaddad, A., Hanna, J., Matta, J. & Daoud, Z. Understanding the Epidemiology of Multi-  
992 Drug Resistant Gram-Negative Bacilli in the Middle East Using a One Health Approach. *Front.*  
993 *Microbiol.* **10**, 1941 (2019).
- 994 50. Liu, B.-T., Song, F.-J., Zou, M., Hao, Z.-H. & Shan, H. Emergence of Colistin Resistance Gene *mcr-1*  
995 in *Cronobacter sakazakii* Producing NDM-9 and in *Escherichia coli* from the Same Animal. *Antimicrob.*  
996 *Agents Chemother.* **61**, 1–6 (2017).
- 997 51. Le, L. *et al.* Coexistence Of Plasmid-Mediated *mcr-1* And *bla* NDM-4 Genes In A *Klebsiella*  
998 *pneumoniae* Clinical Strain In Vietnam. *Infect Drug Resist* **12**, 3703–3707 (2019).
- 999 52. da Silva, H. R. F., Vilela, M. A., Almeida, A. C. S. & de Morais, M. M. C. Colistin-resistant KPC-2-  
1000 producing *Klebsiella pneumoniae* ST423 harboring an IS5-like element in the *mgrB* gene isolated from  
1001 cerebrospinal fluid. *Diagn. Microbiol. Infect. Dis.* **91**, 184–185 (2018).
- 1002 53. Li, X. *et al.* Detection and characterization of a clinical *Escherichia coli* ST3204 strain coproducing  
1003 NDM-16 and MCR-1. *Infect. Drug Resist.* **11**, 1189–1195 (2018).
- 1004 54. Kumar, S., Stecher, G. & Tamura, K. MEGA7: Molecular Evolutionary Genetics Analysis Version 7.0  
1005 for Bigger Datasets. *Mol. Biol. Evol.* **33**, 1870–1874 (2016).
- 1006 55. Wyres, K. L. & Holt, K. E. *Klebsiella pneumoniae* Population Genomics and Antimicrobial-Resistant

- 1007 Clones. *Trends Microbiol.* **24**, 944–956 (2016).
- 1008 56. Liu, B.-T. *et al.* High Incidence of Escherichia coli Strains Coharboring mcr-1 and blaNDM from  
1009 Chickens. *Antimicrob. Agents Chemother.* **61**, pii: e02347-16 (2017).
- 1010 57. Yildiz, S. S., Kaşatepe, B., Şiğirli, H. & Sarıgüzel, F. M. High rate of colistin and fosfomycin  
1011 resistance among carbapenemase-producing Enterobacteriaceae in Turkey. *Acta Microbiol. Immunol.*  
1012 *Hung.* **66**, 103–112 (2019).
- 1013 58. Peng, Z. *et al.* Characteristics of Carbapenem-Resistant and Colistin-Resistant Escherichia coli Co-  
1014 Producing NDM-1 and MCR-1 from Pig Farms in China. *Microorganisms* **7**, (2019).
- 1015 59. Peng, Z. *et al.* Characteristics of a Colistin-Resistant Escherichia coli ST695 Harboring the  
1016 Chromosomally-Encoded mcr-1 Gene. *Microorganisms* **7**, (2019).
- 1017 60. Faccone, D. *et al.* Characterization of a multidrug resistant Citrobacter amalonaticus clinical isolate  
1018 harboring blaNDM-1 and mcr-1.5 genes. *Infect. Genet. Evol.* **67**, 51–54 (2019).
- 1019 61. Chavda, B. *et al.* Coidentification of mcr-4.3 and blaNDM-1 in a Clinical Enterobacter cloacae Isolate  
1020 from China. *Antimicrob. Agents Chemother.* **62**, (2018).
- 1021 62. Wang, X. *et al.* Emergence of a novel mobile colistin resistance gene, mcr-8, in NDM-producing  
1022 Klebsiella pneumoniae. *Emerg. Microbes Infect.* **7**, 122 (2018).
- 1023 63. Nishida, S. & Ono, Y. Genomic analysis of a pan-resistant Klebsiella pneumoniae sequence type 11  
1024 identified in Japan in 2016. *Int. J. Antimicrob. Agents* **55**, 105854 (2020).
- 1025 64. Pulss, S., Semmler, T., Prenger-Berninghoff, E., Bauerfeind, R. & Ewers, C. First report of an  
1026 Escherichia coli strain from swine carrying an OXA-181 carbapenemase and the colistin resistance  
1027 determinant MCR-1. *Int. J. Antimicrob. Agents* **50**, 232–236 (2017).
- 1028 65. Shen, Z. *et al.* Emerging Carriage of NDM-5 and MCR-1 in Escherichia coli From Healthy People in  
1029 Multiple Regions in China: A Cross Sectional Observational Study. *EClinicalMedicine* **6**, 11–20 (2018).
- 1030 66. Guo, Q. *et al.* IncX2 and IncX1-X2 hybrid plasmids coexisting in a FosA6-producing Escherichia coli  
1031 strain. *Antimicrob. Agents Chemother.* **61**, (2017).
- 1032 67. Wang, Y. *et al.* Comprehensive resistome analysis reveals the prevalence of NDM and MCR-1 in  
1033 Chinese poultry production. *Nat. Microbiol.* **2**, 16260 (2017).
- 1034 68. Le-Ha, T. D. *et al.* Characterization of a carbapenem- and colistin-resistant Enterobacter cloacae  
1035 carrying Tn6901 in bla NDM-1 genomic context. *Infect Drug Resist* **12**, 733–739 (2019).
- 1036 69. Poirel, L., Kieffer, N., Liassine, N., Thanh, D. & Nordmann, P. Plasmid-mediated carbapenem and  
1037 colistin resistance in a clinical isolate of Escherichia coli. *Lancet Infect Dis* **16**, 281 (2016).
- 1038 70. Kong, L.-H. *et al.* Various Sequence Types of Escherichia coli Isolates Coharboring blaNDM-5 and  
1039 mcr-1 Genes from a Commercial Swine Farm in China. *Antimicrob. Agents Chemother.* **61**, (2017).
- 1040 71. Ho, P. L. *et al.* IncX3 Epidemic Plasmid Carrying bla(NDM-5) in Escherichia coli from Swine in  
1041 Multiple Geographic Areas in China. *Antimicrob Agents Chemother* **62**, (2018).
- 1042 72. Tacao, M. *et al.* mcr-1 and blaKPC-3 in Escherichia coli Sequence Type 744 after Meropenem and  
1043 Colistin Therapy, Portugal. *Emerg. Infect. Dis.* **23**, 1419–1421 (2017).
- 1044 73. Moubareck, C. A. *et al.* Clonal emergence of Klebsiella pneumoniae ST14 co-producing OXA-48-type  
1045 and NDM carbapenemases with high rate of colistin resistance in Dubai, United Arab Emirates. *Int. J.*  
1046 *Antimicrob. Agents* **52**, 90–95 (2018).
- 1047 74. Wang, M. Antimicrobial resistance in China: challenges and actions. *Clin. Infect. Dis.* **67**, S127–S127  
1048 (2018).
- 1049 75. Mega, E. R. Alarm as antimicrobial resistance surges among chickens, pigs and cattle. *Nature* (2019).
- 1050 76. Zhou, Y.-F. *et al.* Increased activity of colistin in combination with amikacin against Escherichia coli  
1051 co-producing NDM-5 and MCR-1. *J. Antimicrob. Chemother.* **72**, 1723–1730 (2017).



- 1052 77. Kong, L. H. *et al.* Various Sequence Types of Escherichia coli Isolates Coharboring blaNDM-5 and  
1053 mcr-1 Genes from a Commercial Swine Farm in China. *Antimicrob Agents Chemother* **61**, (2017).
- 1054 78. Van, T. T. H., Yidana, Z., Smooker, P. M. & Coloe, P. J. Antibiotic use in food animals worldwide,  
1055 with a focus on Africa: Pluses and minuses. *J. Glob. Antimicrob. Resist.* **20**, 170–177 (2020).
- 1056 79. Schages, L., Wichern, F., Kalscheuer, R. & Bockmühl, D. Winter is coming - Impact of temperature on  
1057 the variation of beta-lactamase and mcr genes in a wastewater treatment plant. *Sci Total Env.* **712**,  
1058 136499 (2020).
- 1059 80. Annavajhala, M. K., Gomez-Simmonds, A. & Uhlemann, A.-C. Multidrug-resistant Enterobacter  
1060 cloacae complex emerging as a global, diversifying threat. *Front. Microbiol.* **10**, 44 (2019).
- 1061 81. Yang, R.-S. *et al.* Emergence of NDM-5-and MCR-1-producing Escherichia coli clones ST648 and  
1062 ST156 from a single muscovy duck (*Cairina moschata*). *Antimicrob. Agents Chemother.* **60**, 6899–6902  
1063 (2016).
- 1064 82. Lowe, M. *et al.* Klebsiella pneumoniae ST307 with blaOXA-181, South Africa, 2014–2016. *Emerg.*  
1065 *Infect. Dis.* **25**, 739 (2019).
- 1066 83. McConville, T. H. *et al.* CrrB Positively Regulates High-Level Polymyxin Resistance and Virulence in  
1067 Klebsiella pneumoniae. *Cell Rep.* **33**, 108313 (2020).
- 1068 84. Choi, M. *et al.* The Diversity of Lipopolysaccharide (O) and Capsular Polysaccharide (K) Antigens of  
1069 Invasive Klebsiella pneumoniae in a Multi-Country Collection. *Front. Microbiol.* **11**, 1249 (2020).
- 1070 85. Jin, L. *et al.* Emergence of mcr-1 and carbapenemase genes in hospital sewage water in Beijing, China.  
1071 *J. Antimicrob. Chemother.* **73**, 84–87 (2018).
- 1072 86. Wang, Q. *et al.* Phenotypic and Genotypic Characterization of Carbapenem-resistant  
1073 Enterobacteriaceae: Data from a Longitudinal Large-scale CRE Study in China (2012-2016). *Clin.*  
1074 *Infect. Dis.* **67**, S196–S205 (2018).
- 1075

1076 **Figures and supplementary material**

1077 **Figures**

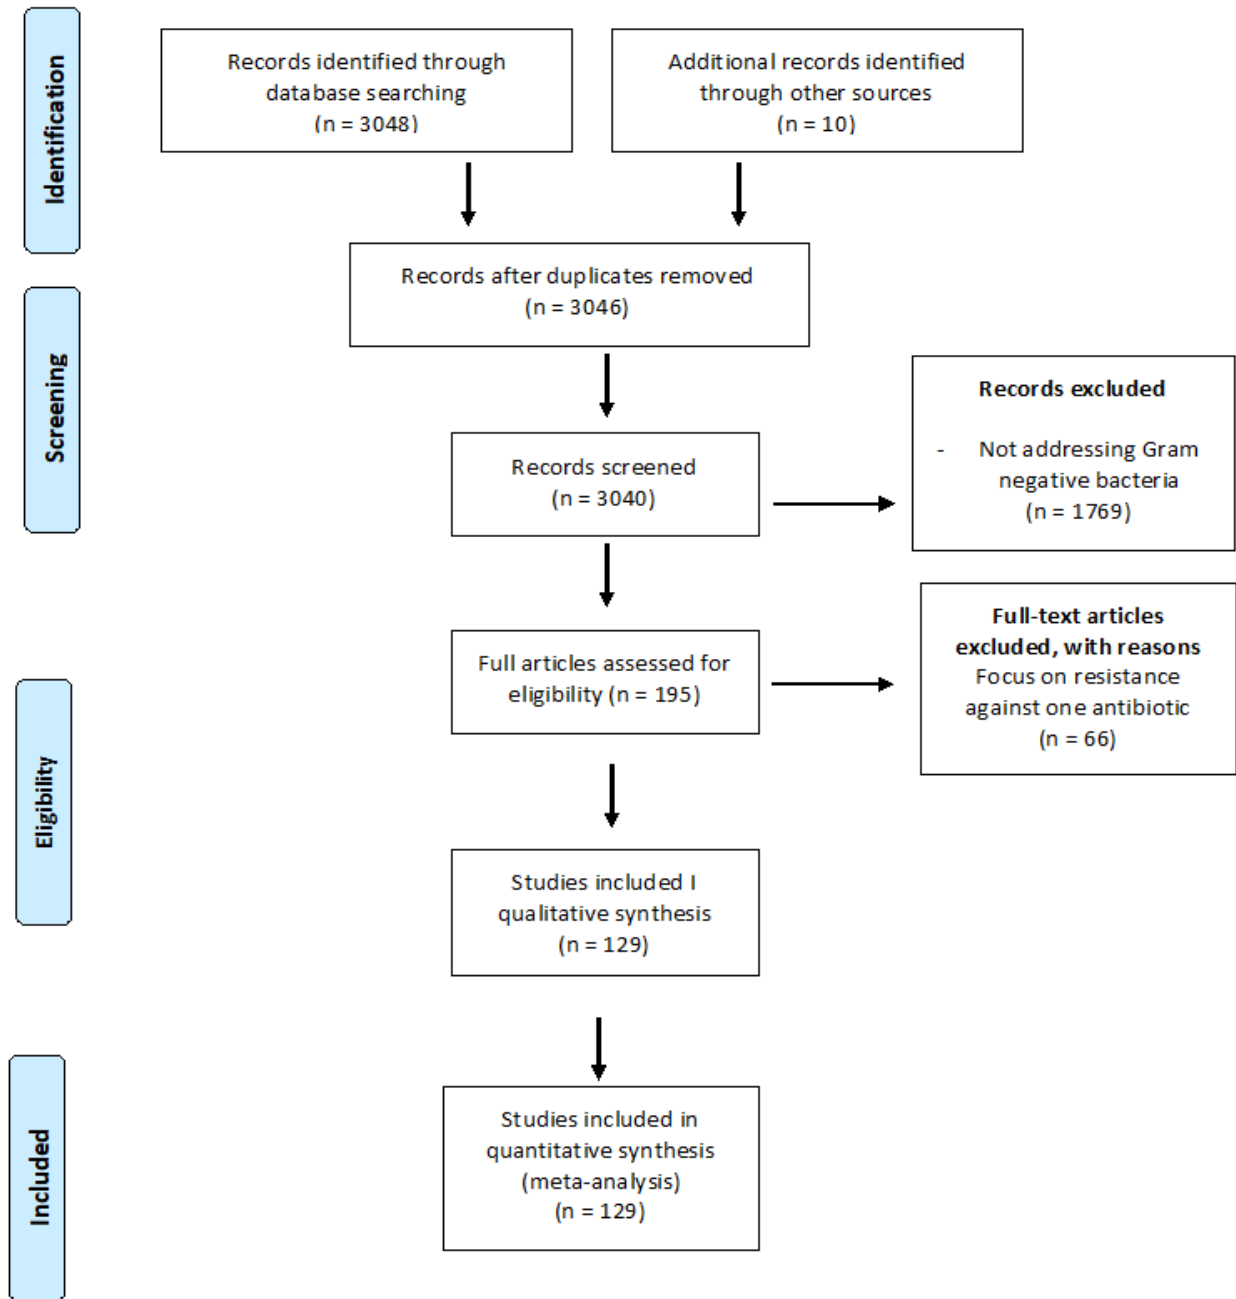

1078

1079 **Figure 1:** A flow chart showing the literature search strategy, inclusion, and exclusion

1080 criteria used for sorting the data.

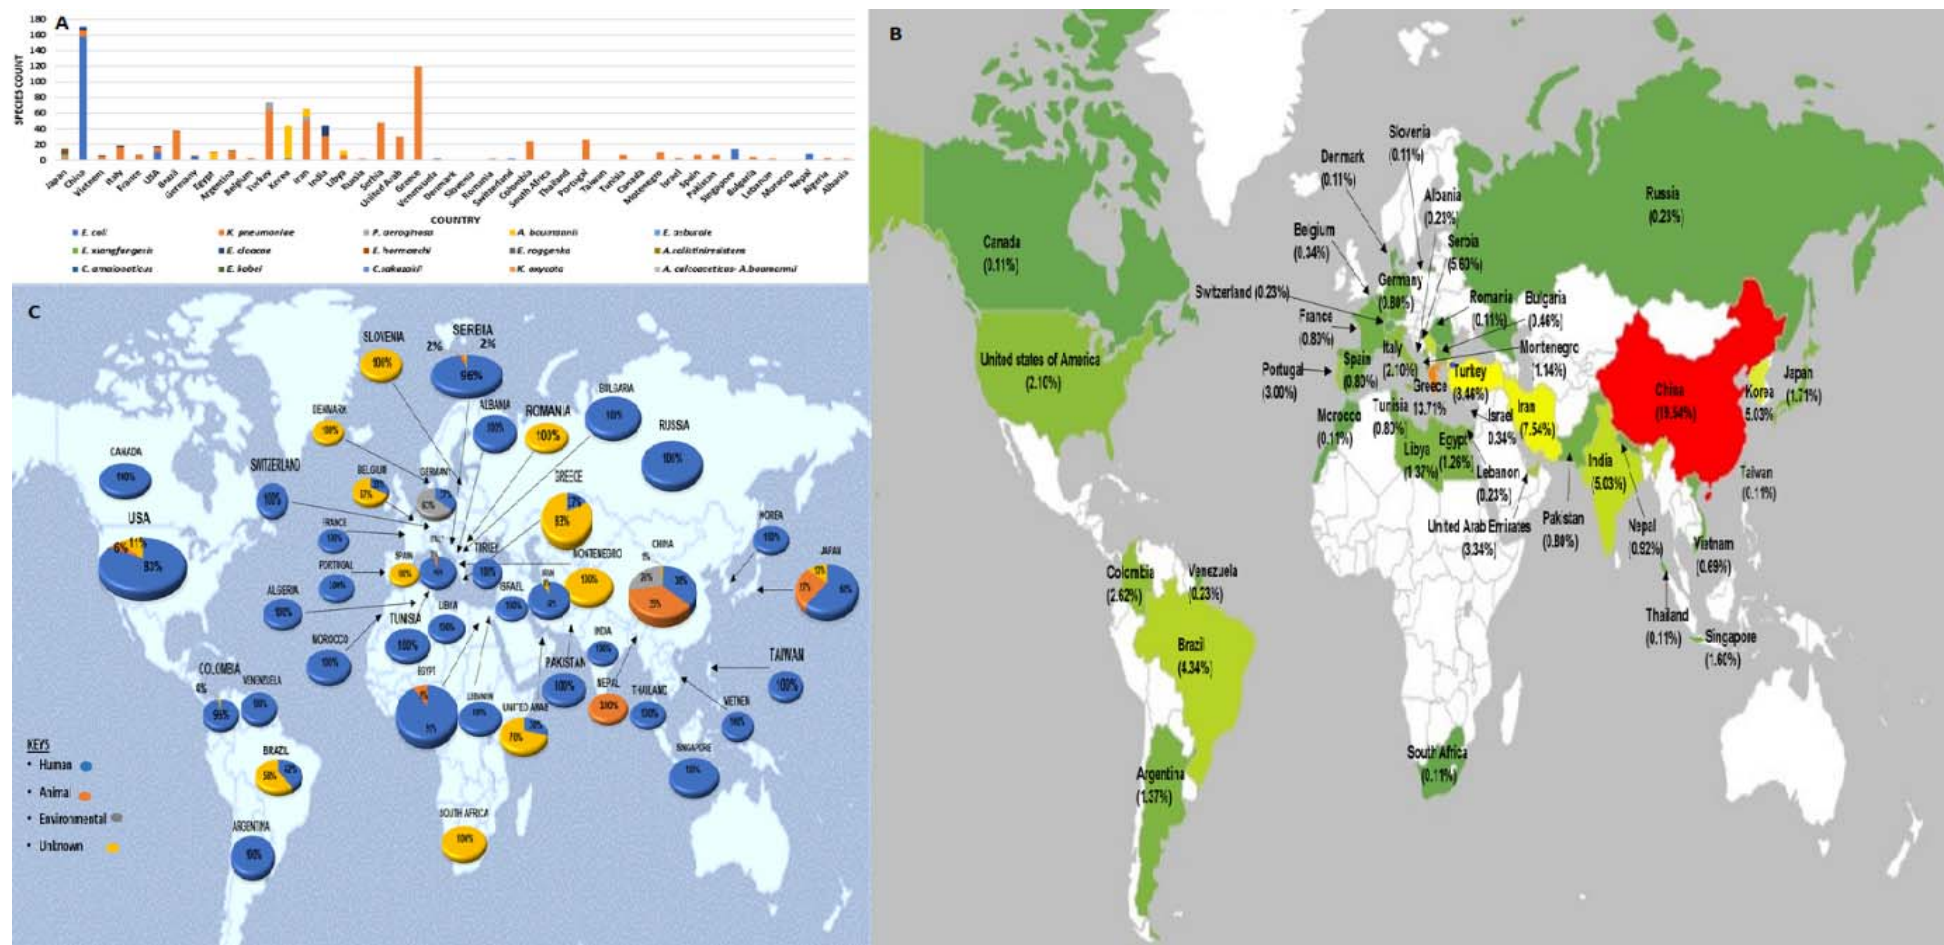

**Figure 2: Global distribution of species and sample sources from which carbapenem and polymyxin-resistant Gram-negative bacteria were isolated from.** (A) shows the global species distribution of GNB with carbapenem and colistin co-resistance per country, (B) Global distribution of carbapenem and colistin co-resistance in GNB. The scale ranges from a country with the highest prevalence (red) to the one with the lowest distribution (green) and (C) shows species count in different countries based on the source of isolation.

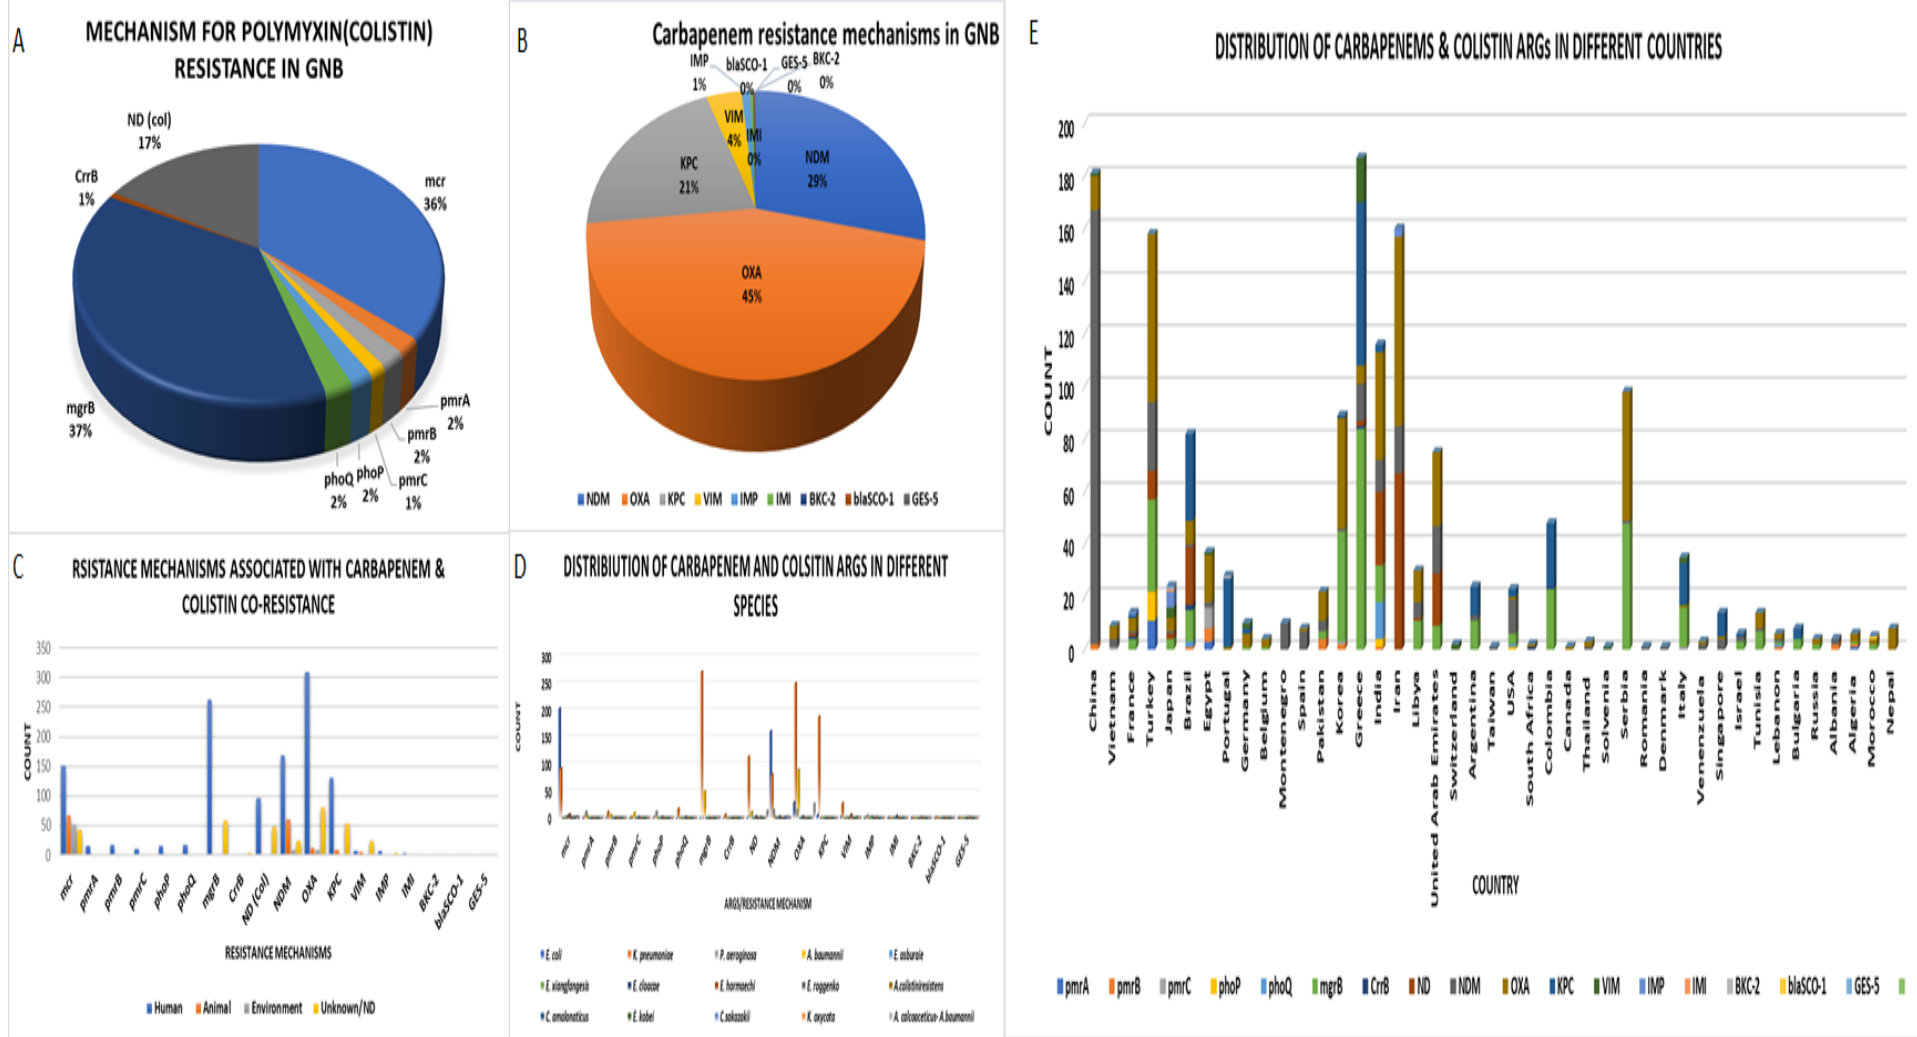

7 **Figure 3: Types and distribution of colistin and carbapenem resistance mechanisms and associated resistance genes.** (A) Resistome dynamics of colistin in GNB that are co-resistant to  
8 carbapenem and colistin. (B) Carbapenem resistance mechanisms in GNB that are co-resistant to carbapenem and colistin. (C) shows resistance mechanisms based on species source. (D)  
9 shows carbapenem and colistin resistance mechanisms in different species. (E) shows the distribution of carbapenamases and colistin ARGs in different countries.





3 **Figure 4: Global genomic resistome analysis of Gram-negative bacteria with carbapenem and polymyxin co-resistance**  
4 **genes.** (A) and (B) both show the global distribution of other ARGs in addition to carbapenamases and colistin resistance genes in  
5 GNB in different countries.



6

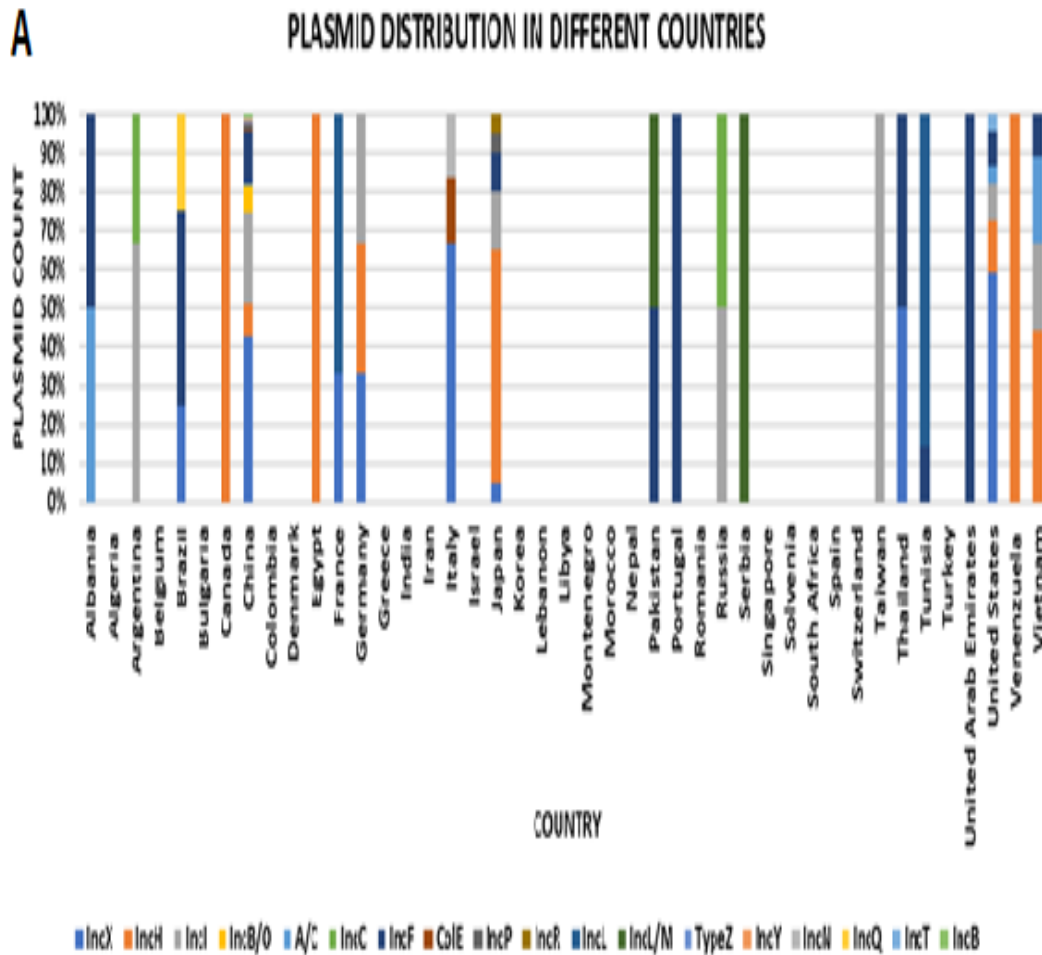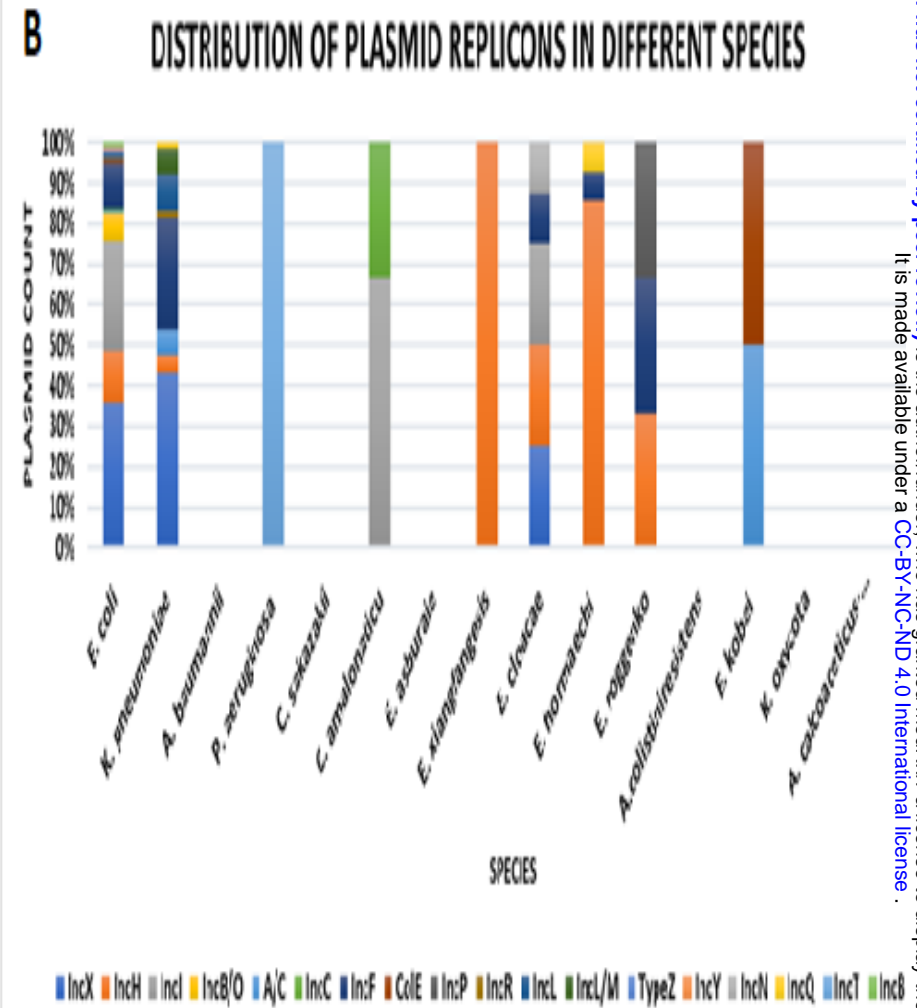

7

8

9

**Figure 5: Global distribution of plasmid types found in Gram-negative bacteria with carbapenem and polymyxin co-resistance genes. (A) shows plasmid replicons associated with carbapenemases and colistin ARGs in different countries. (B) shows plasmid replicons in different species.**

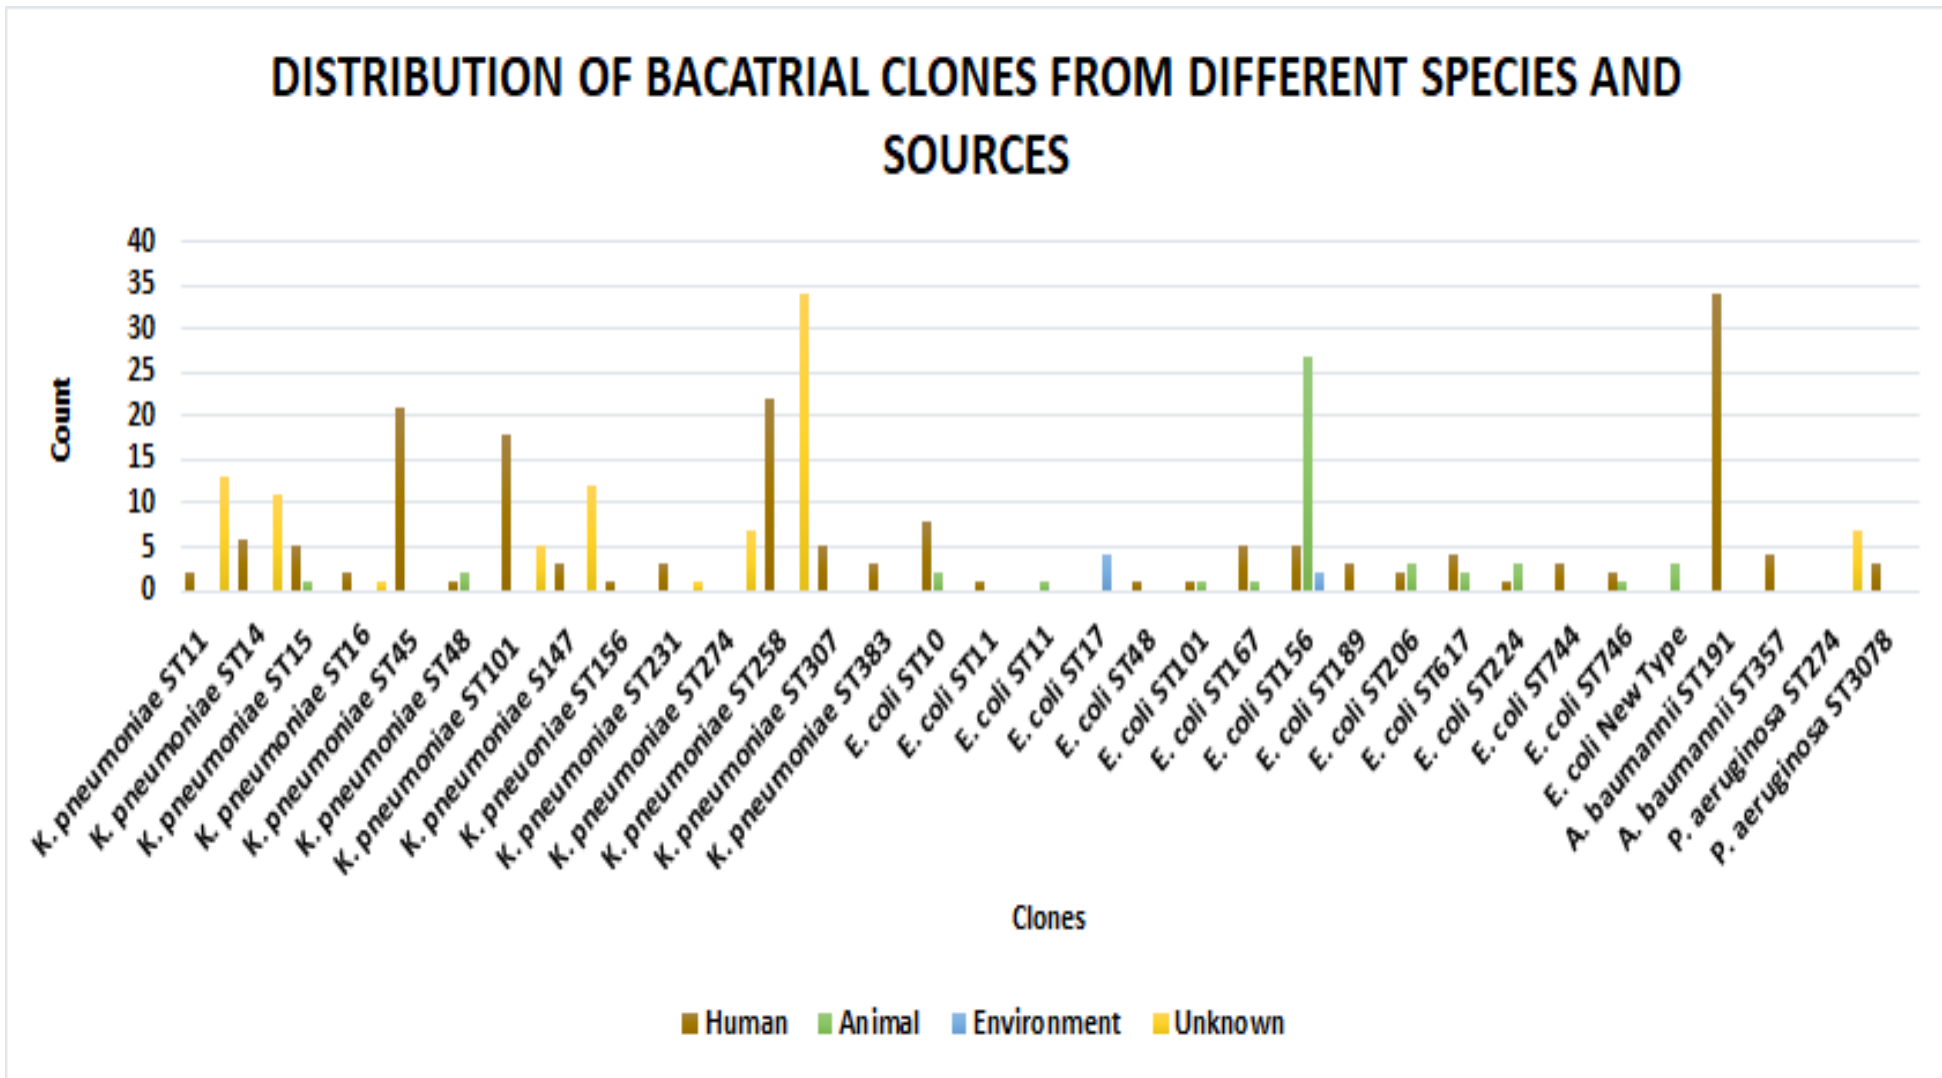

Figure 6: Distribution of bacterial sequence types based on country, species, and specimen source.

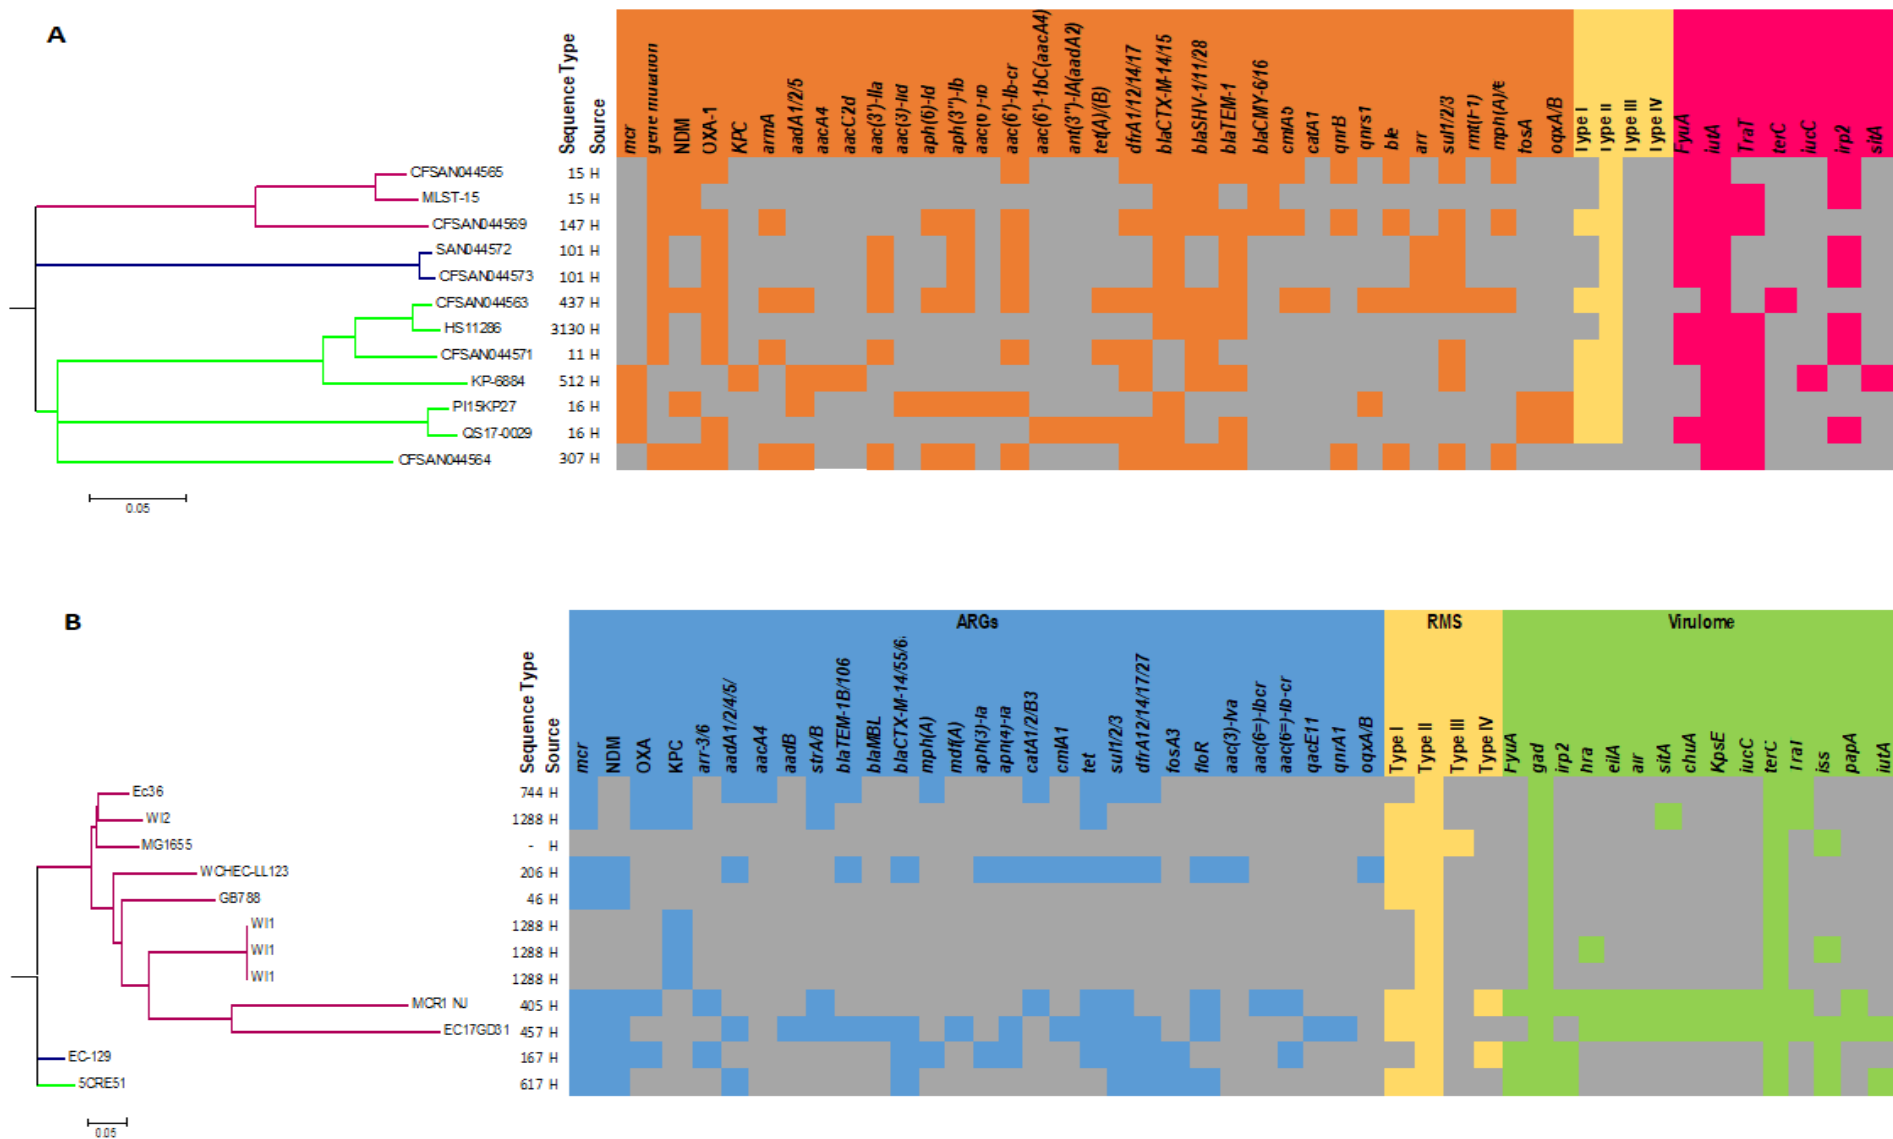

**Figure 7: (A):** Resistome dynamics of *K. pneumoniae* isolates with carbapenem and colistin co-resistance. Orange and white blocks represents presence and absence of ARGs, respectively.

**(B):** Resistome dynamics of *E. coli* isolates with carbapenem and colistin co-resistance. Red and white blocks represents presence and absence of ARGs, respectively.

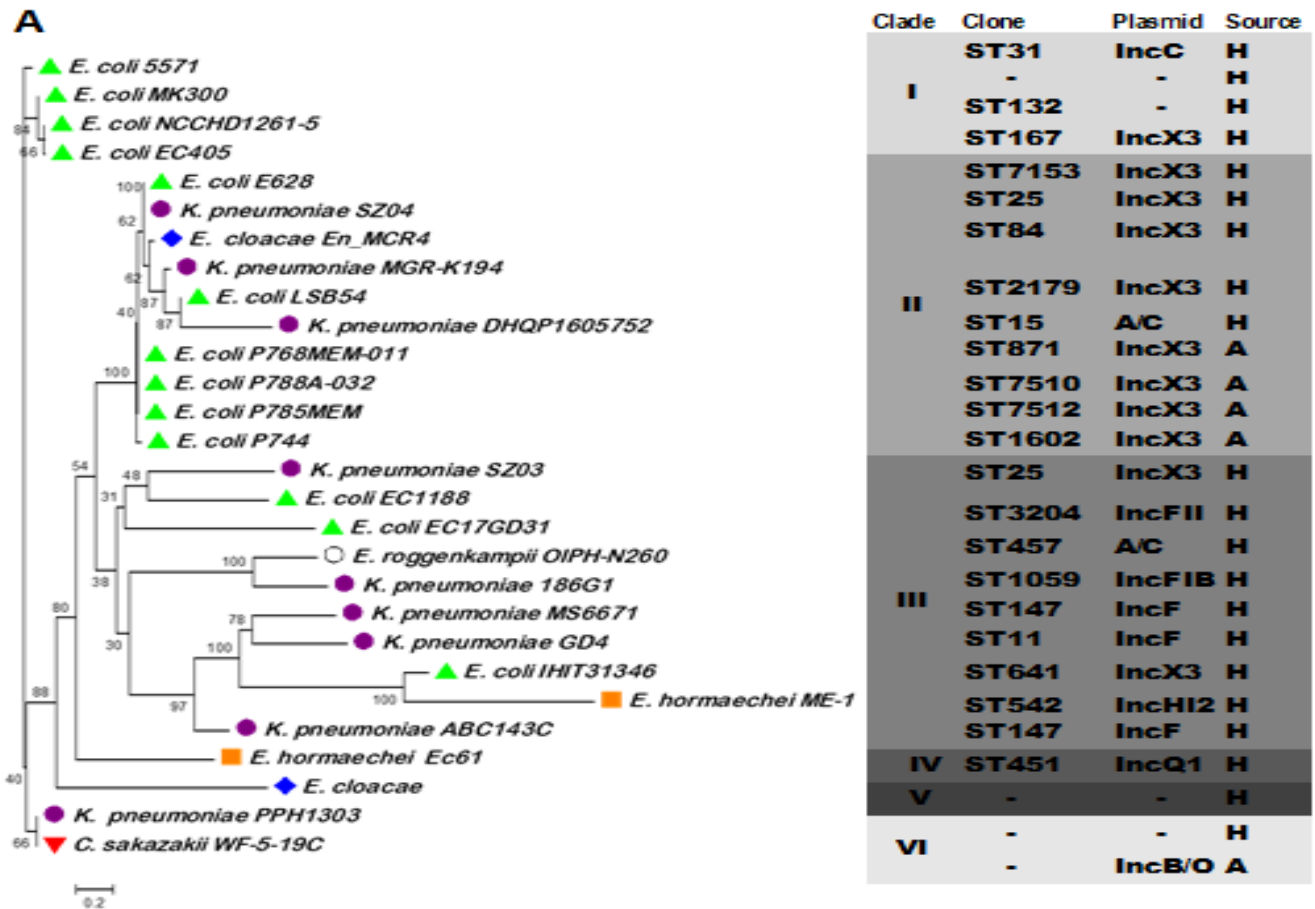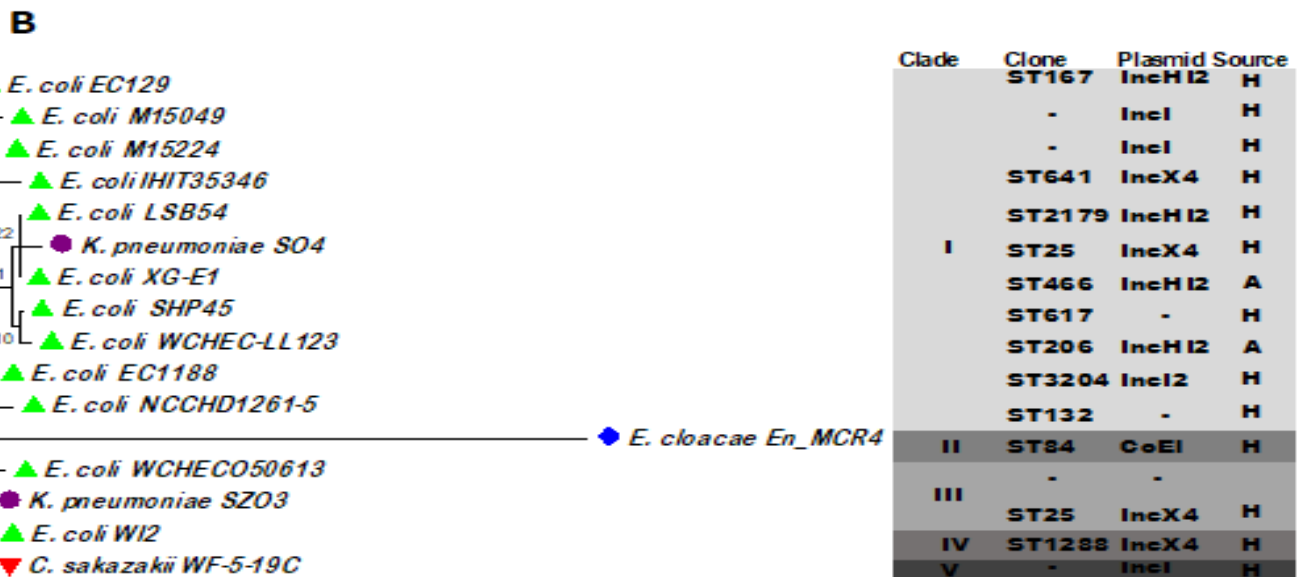

15 **Figure 8: Evolutionary phylogenetics of plasmids harbouring carbapenem and polymyxin resistance determinants. (A)**  
 16 Plasmid evolutionary analyses of plasmids replicons associated with carbapenemases. **(B)** Plasmid evolutionary analyses of  
 17 plasmids replicons associated with colistin ARG, *mcr-1*. *E. coli*, *K. pneumoniae*, *E. cloacae*, *E. roggenkampii*, *E. hormaechei* and  
 18 *C. sakazakii* isolates are shown by green triangle, purple circle, blue diamond shape, clear circle orange square and red triangle,  
 19 respectively.



0 **Supplementary Figures**

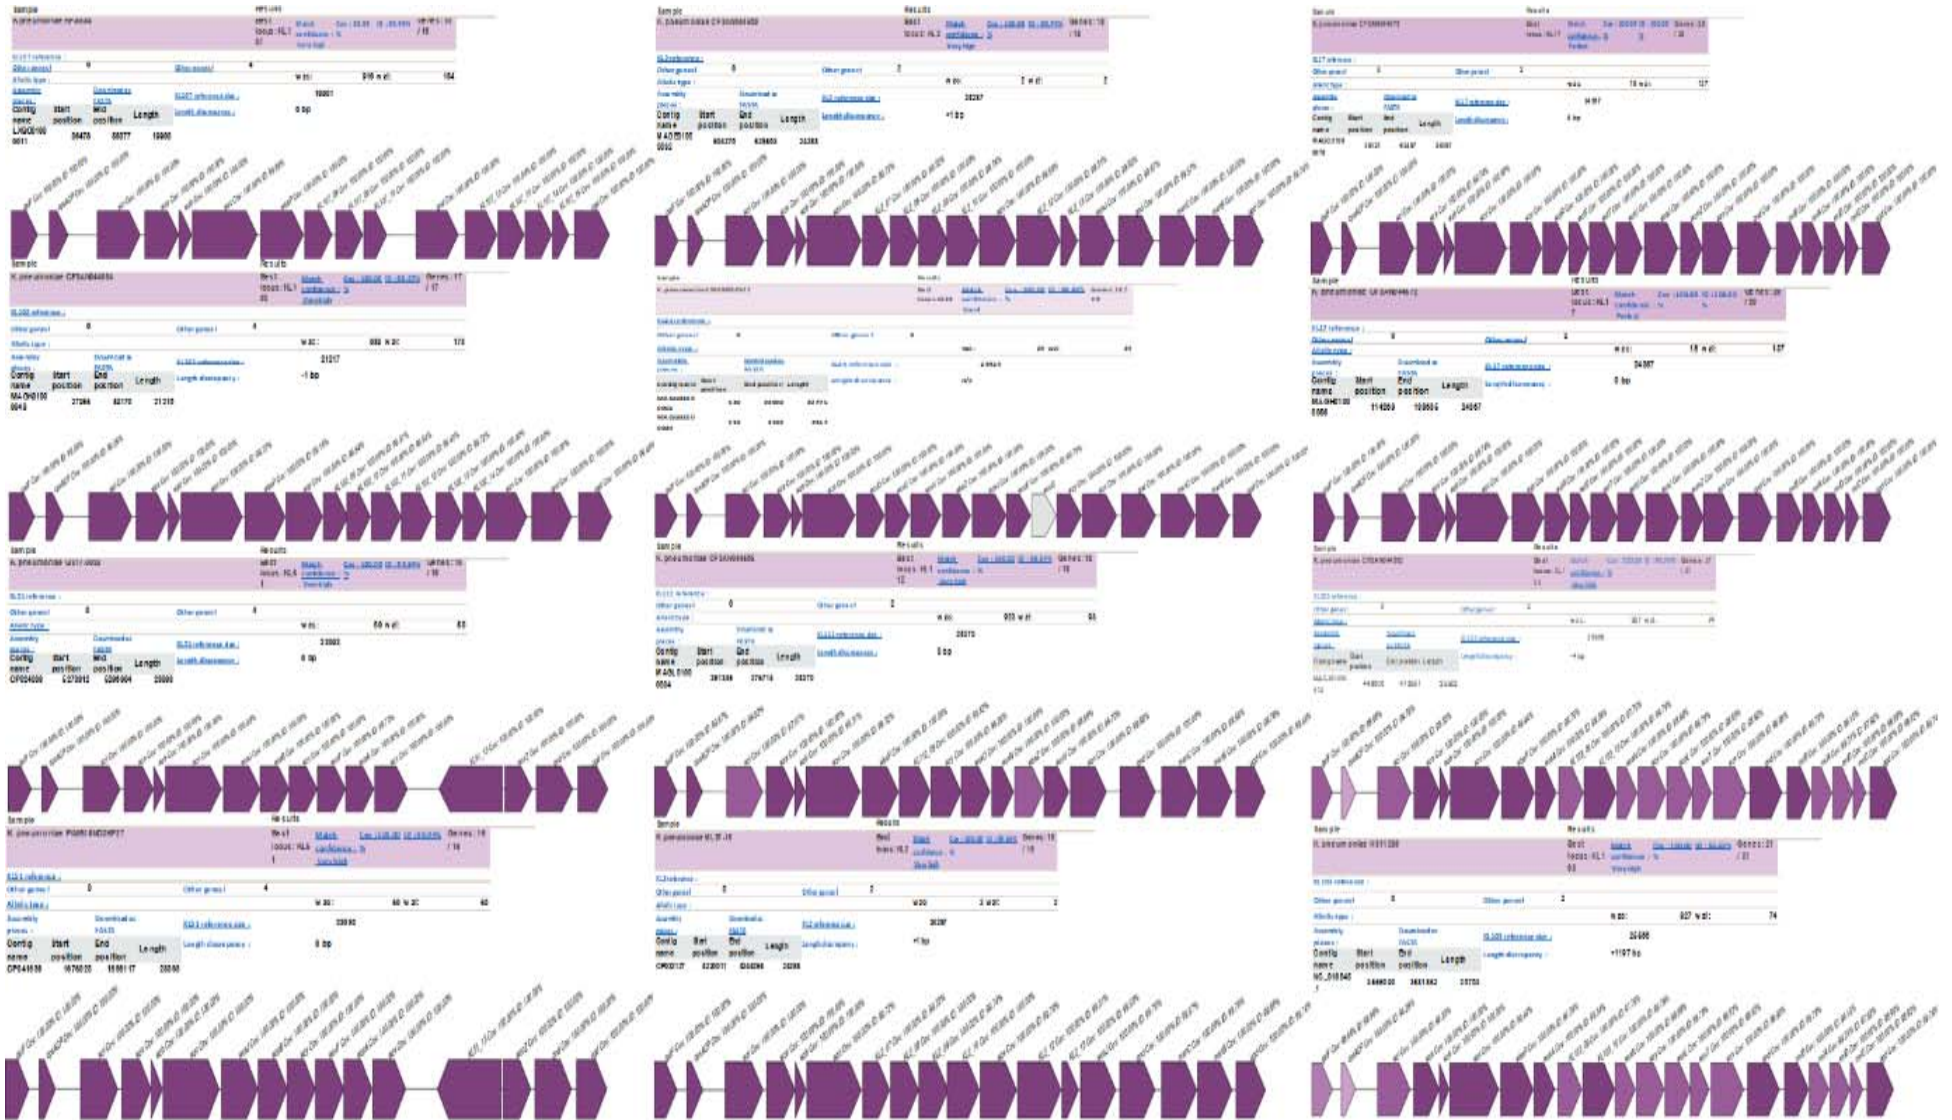

1  
2 **Figure S1: Capsular polysaccharide predictions of carbapenem and colistin resistant GNB based on the K-locus of *K. pneumoniae*.**

3 **Supplementary Tables**

4 **Table S1. Excluded and included articles.** (A): Data showing excluded papers and (B): shows papers included for meta-analyses.

5 **Table S2. Dataset of extracted data from included articles.** (A): Data showing geographical location, sample source, species, clones, genetic environment, antibiotic resistant genes (ARGs),  
6 mobile genetic elements (MGEs) and plasmids replicons/incompatibility (Inc) of GNB isolates which are co-resistant to carbapenem and colistin, (B): species distributions per country, (C):  
7 specimen source in different countries, (D): ARG distributions in different countries, (E): ARG distributions in different species, (F) Sequence types for isolates with carbapenem and colistin  
8 co-resistance globally based on country of isolation, specimen source and species type.

9 **Table S3. Dataset of genomic analysis of downloaded genomes.** (A): Data showing the MGEs that are responsible for the transmissions of carbapenem and colistin resistance among GNB,  
0 (B): global distribution of plasmid replicons associated with carbapenemases and colistin ARGs from included articles and (C): Plasmid distributions in different species.

1 **Table S4: Analysis of virulence factors (virulome) in carbapenem and colistin resistant isolates from various countries.**

2 **Table S5: Methylome data of carbapenem and colistin resistant isolates showing Type I, II, III and IV restriction modification systems in different isolates.**
